# Supplementary material for: p53 activates the PANK1/miRNA-107 gene leading to downregulation of CDK6 and p130 cell cycle proteins
Source: PubMed Central journal article supplement — Nucleic Acids Res. 2010 Sep 10;39(2):440–53. doi: 10.1093/nar/gkq796 (PMC3025554; doi:10.1093/nar/gkq796), 2010-09-10
Supplement: supp_gkq796_BA_hlig_et_al_Supplementary_Data.pdf [file supp_gkq796_BA_hlig_et_al_Supplementary_Data.pdf]

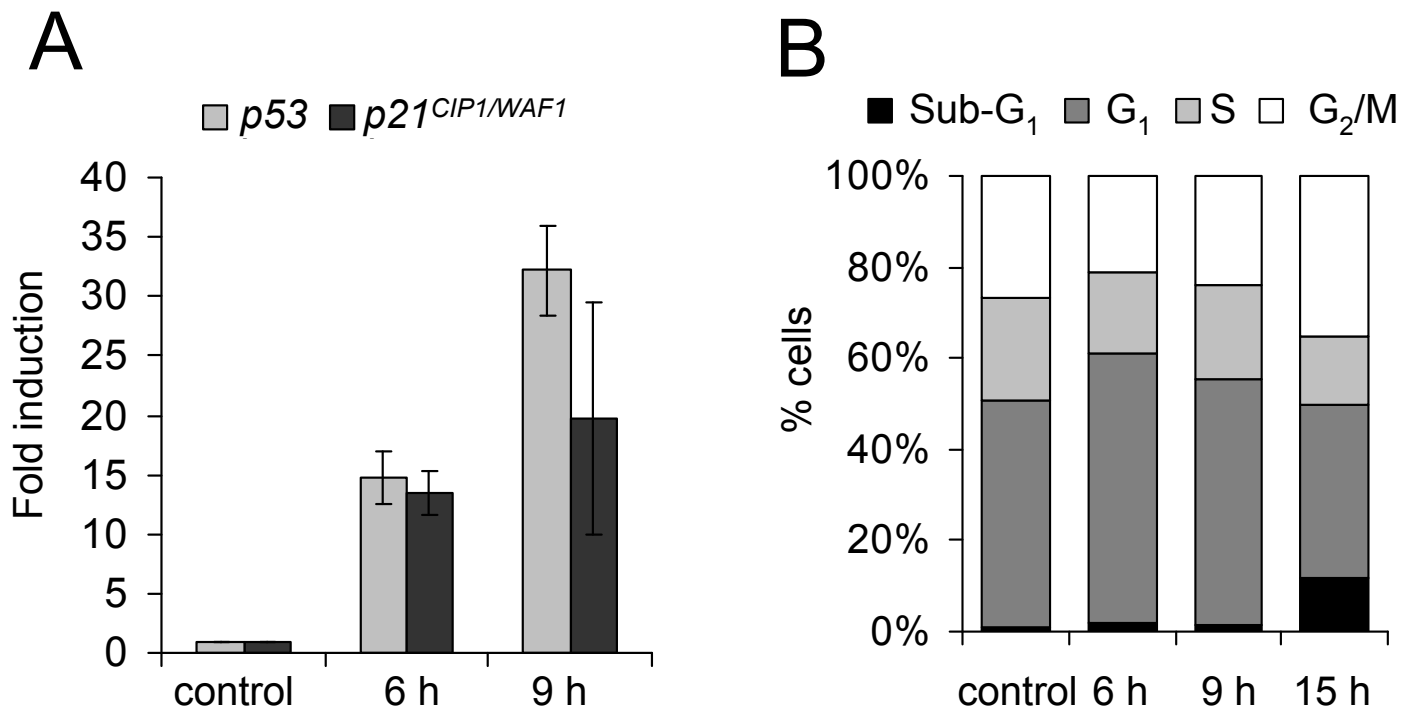

Figure S1

Induction of p53wt or p53mut in D53 cells. Cells were induced and harvested at different time points. (A)  $p53$  mRNA and the regulation of  $p21^{CIP1/WAF1}$  were measured via real-time RT-PCR.  $GAPDH$  expression was used to normalize expression levels. (B) In order to control for comparable cell cycle distribution during p53wt induction, DNA was stained with propidium iodide and analyzed by FACS.

Böhlig et al.  
Supplementary Figure S2

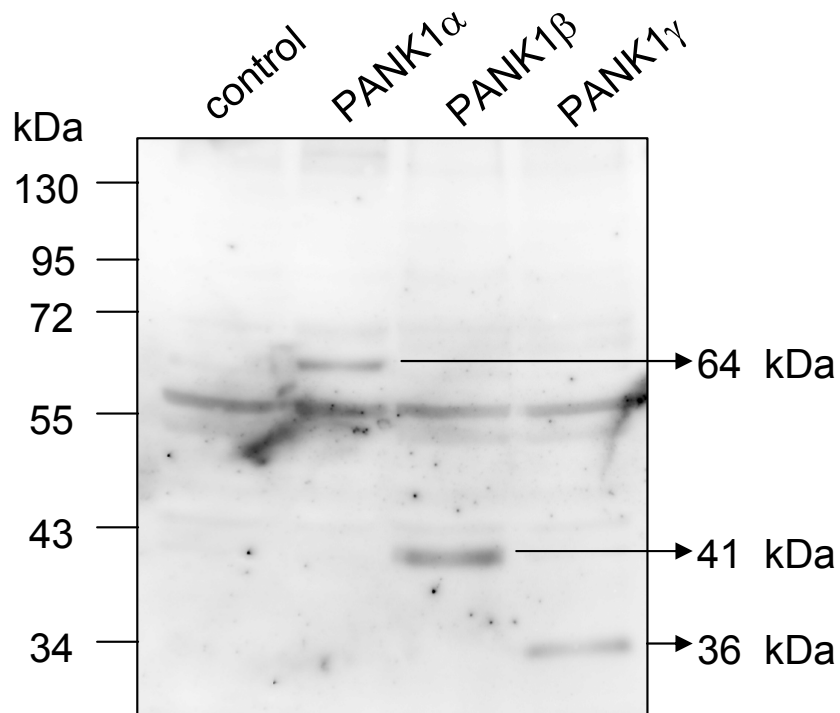

Figure S2

Western analysis with a PANK1 antibody detecting all three known PANK1 isoforms. Different expression plasmids or the control vector pcDNA3.1(+) were transfected into HCT116 cells. 24 h after transfection cell lysates were separated by SDS-PAGE and PANK1 was detected. The calculated molecular weights of the three different known PANK1 isoforms are given.

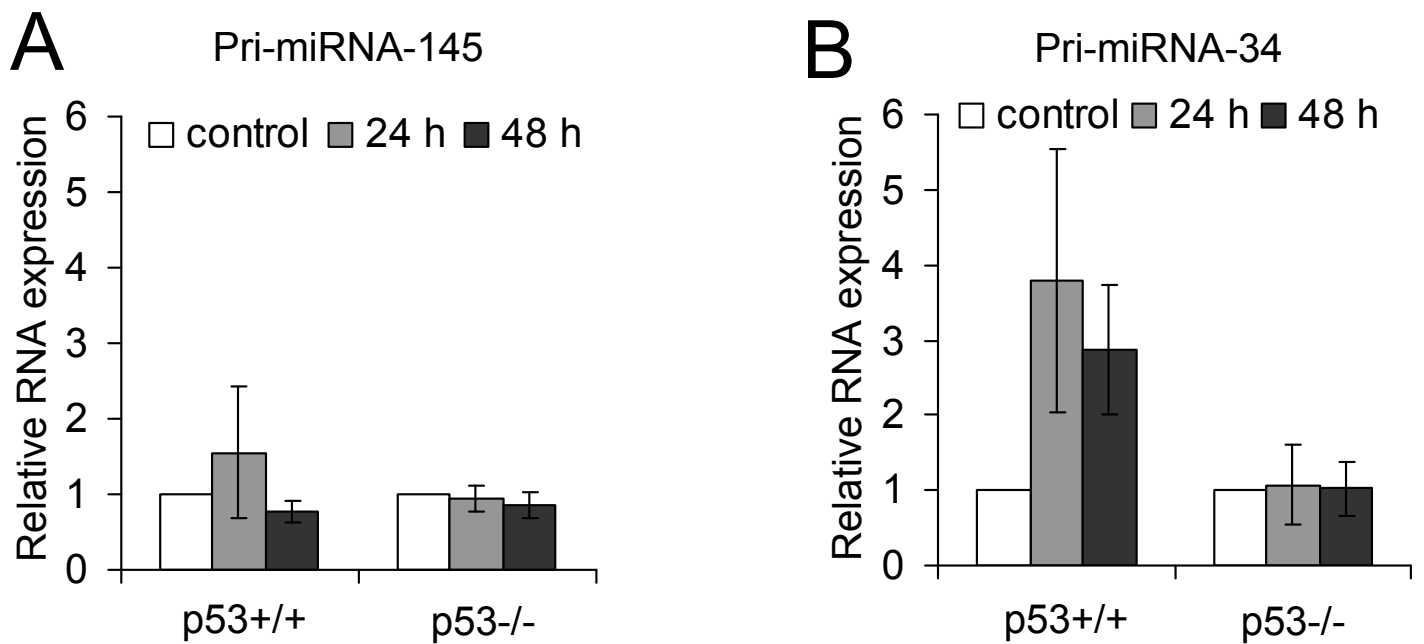

Figure S3

Regulation of other pri-miRNAs in the HCT116 cell system. (A) Expression of pri-miRNA-145 after treatment with doxorubicin. (B) pri-miRNA-34 expression served as a positive control for the transcriptional regulation by wild-type p53.

**A**

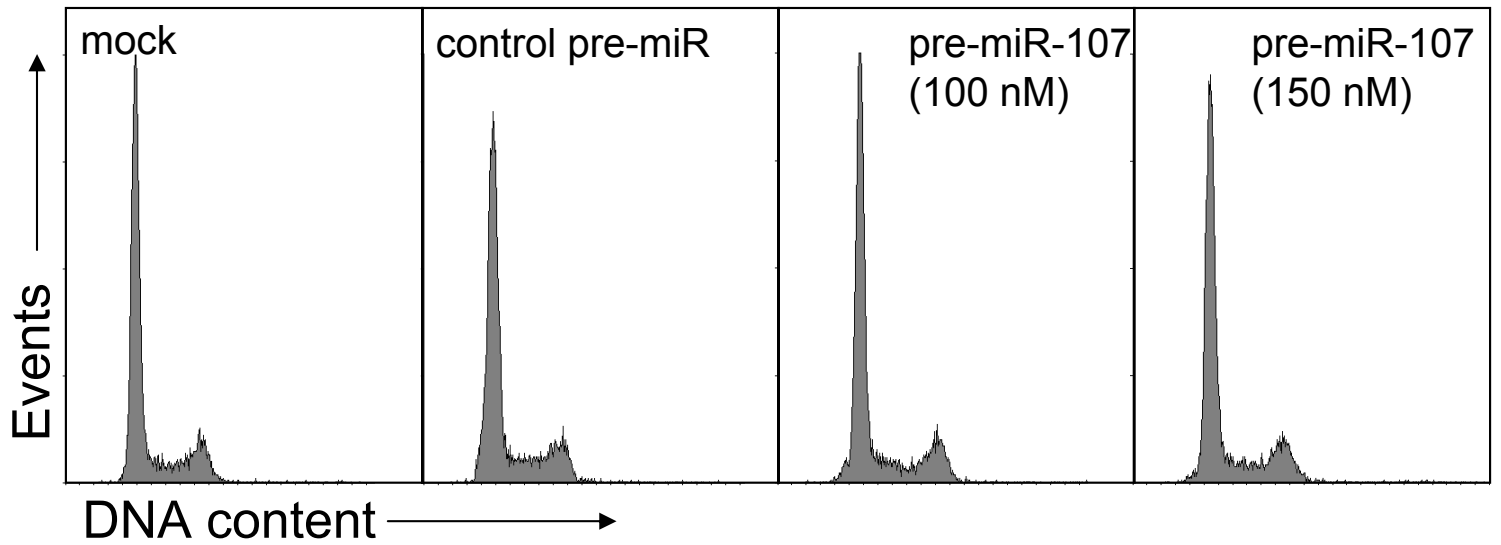

**B**

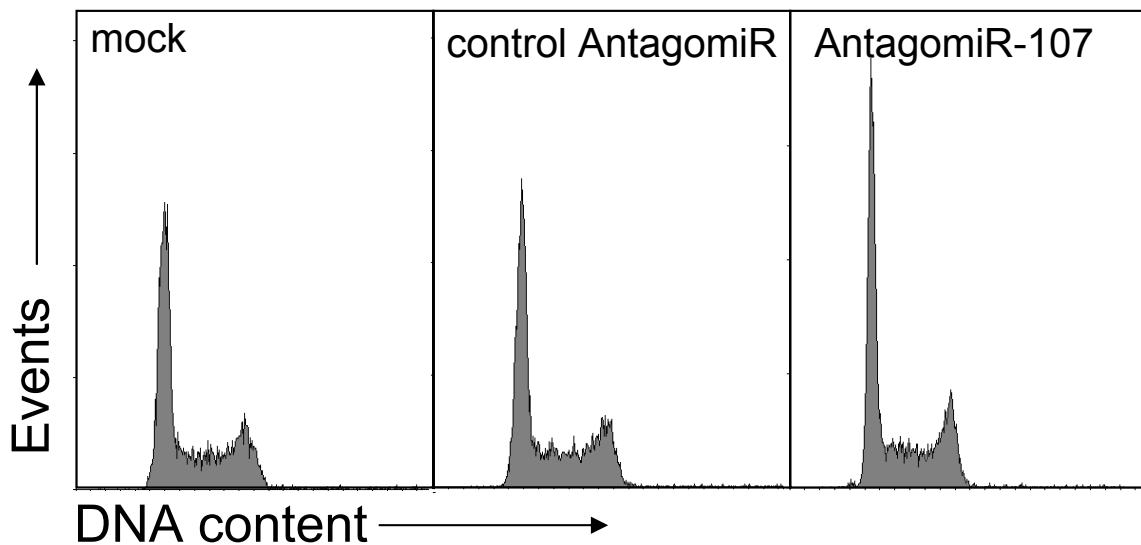

Figure S4

Cell cycle distribution of D53wt cells after transfection of miRNA mimic and AntagomiR. (A) FACS analyses after transfection of controls (mock, control pre-miR) and overexpression of miRNA-107. (B) FACS analyses after transfection of AntagomiR-107 or controls.

A

RNAhybrid miRNA binding site prediction

```
miRNA: 3' -ACUAUCGGG---ACAUGUUAC-GACGA 5'  
      |||| |::| |||:||||| |||  
p130: 5' UUGAUUGUUCGGGUGUGCAAUGUCUGA- 3'
```

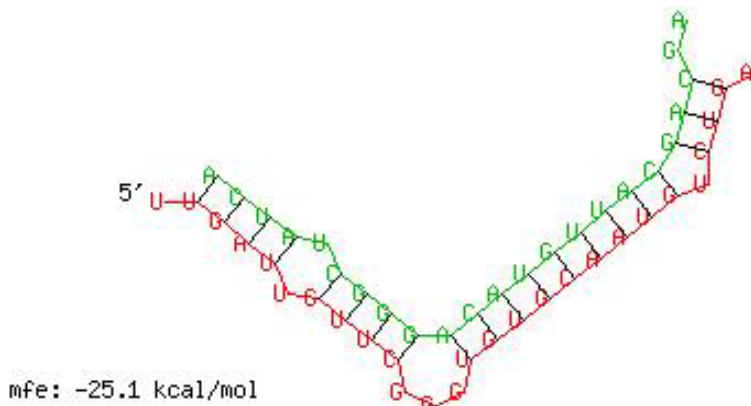

B

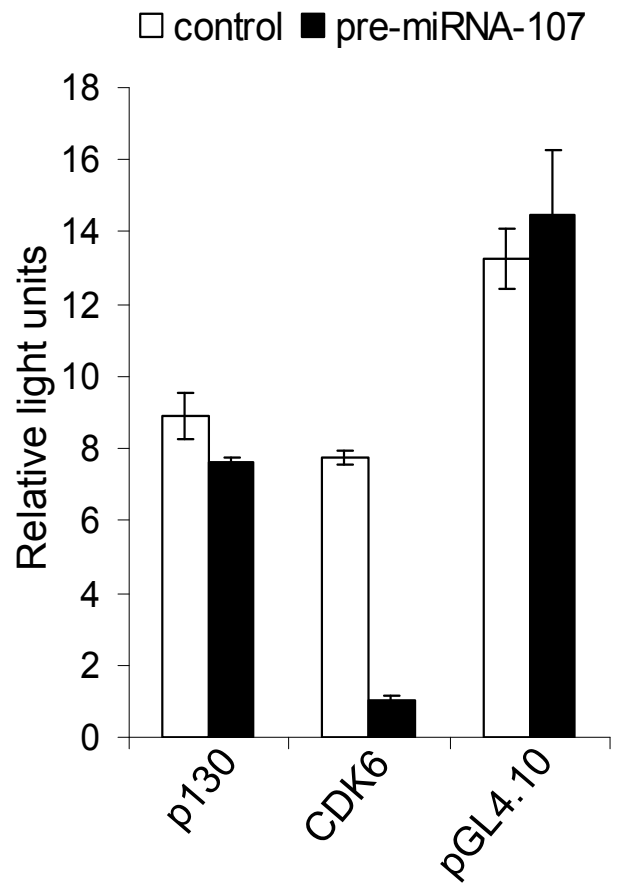

Figure S5

(A) Putative miRNA-107 binding site in the 3'-UTR of p130 predicted by the RNAhybrid algorithm. Minimum free energy (mfe) is given for the mRNA-miRNA interaction. (B) 3'-UTR Luciferase reporter assays were carried out after cotransfection of D53wt cells with Luciferase-UTR reporter and control pre-miRNA (control) or pre-miRNA-107. Empty pGL4.10 vector served as a negative control.

Table S1 Microarray Results

| Probe_Set_ID | Gene Symbol | Fold change | Regulation | Gene Title                                                                                           |
|--------------|-------------|-------------|------------|------------------------------------------------------------------------------------------------------|
| 232164_s_at  | EPPK1       | 63.2        | up         | epiplakin 1                                                                                          |
| 238878_at    | ARX         | 46.3        | up         | aristales related homeobox                                                                           |
| 200632_s_at  | NDRG1       | 46.2        | up         | N-myc downstream regulated gene 1                                                                    |
| 203946_s_at  | ARG2        | 45.2        | up         | arginase, type II                                                                                    |
| 228153_at    | IBRDC2      | 44.8        | up         | IBR domain containing 2                                                                              |
| 237732_at    |             | 44.1        | up         | Transcribed locus, moderately similar to NP_780633,1 hypothetical protein LOC109314 [Mus musculus]   |
| 232165_at    | EPPK1       | 34.9        | up         | epiplakin 1                                                                                          |
| 231969_at    | STOX2       | 28.6        | up         | storkhead box 2                                                                                      |
| 205003_at    | DOCK4       | 27.1        | up         | dedicator of cytokinesis 4                                                                           |
| 212097_at    | CAV1        | 25.5        | up         | caveolin 1, caveolae protein, 22kDa                                                                  |
| 210367_s_at  | PTGES       | 25.5        | up         | prostaglandin E synthase                                                                             |
| 225606_at    | BCL2L11     | 24.2        | up         | BCL2-like 11 (apoptosis facilitator)                                                                 |
| 223748_at    | SLC4A11     | 23.8        | up         | solute carrier family 4, sodium bicarbonate transporter-like, member 11                              |
| 202023_at    | EFNA1       | 21.0        | up         | ephrin-A1                                                                                            |
| 224724_at    | SULF2       | 20.9        | up         | sulfatase 2                                                                                          |
| 230655_at    |             | 20.7        | up         | Transcribed locus, weakly similar to NP_997349,1 FLJ46489 protein [Homo sapiens]                     |
| 1560049_at   |             | 20.7        | up         | Hypothetical gene supported by BC046381                                                              |
| 205534_at    | PCDH7       | 19.7        | up         | BH-protocadherin (brain-heart)                                                                       |
| 203065_s_at  | CAV1        | 19.5        | up         | caveolin 1, caveolae protein, 22kDa                                                                  |
| 209711_at    | SLC35D1     | 19.4        | up         | solute carrier family 35 (UDP-glucuronic acid/UDP-N-acetylgalactosamine dual transporter), member D1 |
| 205559_s_at  | PCSK5       | 18.7        | up         | proprotein convertase subtilisin/kexin type 5                                                        |
| 205807_s_at  | TUFT1       | 18.5        | up         | tuftelin 1                                                                                           |
| 231382_at    | FGF18       | 18.5        | up         | Fibroblast growth factor 18                                                                          |
| 202240_at    | PLK1        | 17.8        | down       | polo-like kinase 1 (Drosophila)                                                                      |
| 228698_at    | SOX7        | 17.3        | up         | SRY (sex determining region Y)-box 7                                                                 |
| 214321_at    | NOV         | 17.2        | up         | nephroblastoma overexpressed gene                                                                    |
| 207030_s_at  | CSRP2       | 17.2        | up         | cysteine and glycine-rich protein 2                                                                  |
| 202912_at    | ADM         | 16.4        | up         | adrenomedullin                                                                                       |
| 238029_s_at  | SLC16A14    | 16.2        | up         | solute carrier family 16 (monocarboxylic acid transporters), member 14                               |
| 220576_at    | PGAP1       | 15.7        | up         | GPI deacylase                                                                                        |
| 227467_at    | RDH10       | 15.6        | up         | retinol dehydrogenase 10 (all-trans)                                                                 |
| 203780_at    | EVA1        | 15.5        | up         | epithelial V-like antigen 1                                                                          |
| 204709_s_at  | KIF23       | 15.3        | down       | kinesin family member 23                                                                             |
| 227964_at    | FKSG44      | 14.6        | up         | FKSG44 gene                                                                                          |
| 219115_s_at  | IL20RA      | 14.5        | up         | interleukin 20 receptor, alpha                                                                       |
| 227432_s_at  | INSR        | 14.2        | up         | Insulin receptor                                                                                     |
| 1558143_a_at | BCL2L11     | 14.2        | up         | BCL2-like 11 (apoptosis facilitator)                                                                 |
| 221012_s_at  | TRIM8       | 14.2        | up         | tripartite motif-containing 8 /// tripartite motif-containing 8                                      |
| 238733_at    |             | 14.1        | up         | Transcribed locus                                                                                    |
| 218627_at    | FLJ11259    | 13.5        | up         | hypothetical protein FLJ11259                                                                        |
| 222453_at    | CYBRD1      | 12.9        | up         | cytochrome b reductase 1                                                                             |
| 238787_at    |             | 12.9        | up         | CDNA FLJ36663 fis, clone UTERU2002826                                                                |
| 230104_s_at  | TPPP        | 12.9        | up         | brain-specific protein p25 alpha                                                                     |
| 1569181_x_at | LOC51326    | 12.6        | up         | ADP-ribosylation factor-like                                                                         |
| 1553613_s_at | FOXC1       | 12.5        | up         | forkhead box C1                                                                                      |
| 220940_at    | KIAA1641    | 12.4        | up         | KIAA1641                                                                                             |
| 232088_x_at  |             | 12.2        | up         | MRNA; cDNA DKFZp586K1721 (from clone DKFZp586K1721)                                                  |
| 221541_at    | CRISPLD2    | 12.2        | up         | cysteine-rich secretory protein LCCL domain containing 2                                             |
| 212599_at    | AUTS2       | 12.0        | up         | autism susceptibility candidate 2                                                                    |
| 208156_x_at  | EPPK1       | 12.0        | up         | epiplakin 1 /// epiplakin 1                                                                          |
| 204855_at    | SERPINB5    | 11.9        | up         | serpin peptidase inhibitor, clade B (ovalbumin), member 5                                            |
| 204255_s_at  | VDR         | 11.8        | up         | vitamin D (1,25- dihydroxyvitamin D3) receptor                                                       |
| 227498_at    |             | 11.7        | up         | CDNA FLJ11723 fis, clone HEMBA1005314                                                                |
| 235033_at    | NPEPL1      | 11.7        | up         | Aminopeptidase-like 1                                                                                |
| 226021_at    | RDH10       | 11.6        | up         | retinol dehydrogenase 10 (all-trans)                                                                 |
| 213348_at    | CDKN1C      | 11.0        | up         | Cyclin-dependent kinase inhibitor 1C (p57, Kip2)                                                     |
| 228613_at    | RAB11FIP3   | 11.0        | up         | RAB11 family interacting protein 3 (class II)                                                        |
| 203945_at    | ARG2        | 10.8        | up         | arginase, type II                                                                                    |
| 220048_at    | EDAR        | 10.8        | up         | ectodysplasin A receptor                                                                             |
| 241370_at    | LOC286052   | 10.7        | up         | hypothetical protein LOC286052                                                                       |
| 204859_s_at  | APAF1       | 10.7        | up         | apoptotic peptidase activating factor                                                                |
| 223229_at    | UBE2T       | 10.6        | down       | ubiquitin-conjugating enzyme E2T (putative)                                                          |
| 222762_x_at  | LIMD1       | 10.6        | up         | LIM domains containing 1                                                                             |
| 1552283_s_at | ZDHHC11     | 10.5        | up         | zinc finger, DHHC-type containing 11                                                                 |
| 223132_s_at  | TRIM8       | 10.4        | up         | tripartite motif-containing 8                                                                        |
| 243768_at    | SENPF6      | 10.3        | up         | SUMO1/sentrin specific peptidase 6                                                                   |
| 38037_at     | HBEGF       | 10.3        | up         | heparin-binding EGF-like growth factor                                                               |
| 202954_at    | UBE2C       | 10.2        | down       | ubiquitin-conjugating enzyme E2C                                                                     |
| 202779_s_at  | UBE2S       | 10.2        | down       | ubiquitin-conjugating enzyme E2S                                                                     |
| 206307_s_at  | FOXD1       | 10.0        | up         | forkhead box D1                                                                                      |
| 235685_at    |             | 10.0        | up         | Transcribed locus                                                                                    |
| 202504_at    | TRIM29      | 9.8         | up         | tripartite motif-containing 29                                                                       |
| 241726_at    | HLCS        | 9.8         | up         | Holocarboxylase synthetase (biotin-(propionyl-Coenzyme A-carboxylase (ATP-hydrolysing)) ligase)      |
| 212124_at    | RAI17       | 9.8         | up         | retinoic acid induced 17                                                                             |
| 203323_at    | CAV2        | 9.8         | up         | caveolin 2                                                                                           |
| 225327_at    | FLJ10980    | 9.7         | up         | hypothetical protein FLJ10980                                                                        |
| 225673_at    | MYADM       | 9.7         | down       | myeloid-associated differentiation marker                                                            |

|              |           |     |      |                                                                                           |
|--------------|-----------|-----|------|-------------------------------------------------------------------------------------------|
| 231925_at    |           | 9,5 | up   | CDNA: FLJ23006 fis, clone LNG00414                                                        |
| 227568_at    | HECTD2    | 9,4 | up   | HECT domain containing 2                                                                  |
| 1557174_a_at | IRAK1BP1  | 9,4 | up   | Interleukin-1 receptor-associated kinase 1 binding protein 1                              |
| 204032_at    | BCAR3     | 9,4 | up   | breast cancer anti-estrogen resistance 3                                                  |
| 229842_at    | ELF3      | 9,4 | up   | E74-like factor 3 (ets domain transcription factor, epithelial-specific)                  |
| 228937_at    | FLJ38725  | 9,3 | up   | hypothetical protein FLJ38725                                                             |
| 225626_at    | PAG1      | 9,2 | up   | phosphoprotein associated with glycosphingolipid microdomains 1                           |
| 226022_at    | SASH1     | 9,2 | up   | SAM and SH3 domain containing 1                                                           |
| 228717_at    | PANK1     | 9,1 | up   | Pantothenate kinase 1                                                                     |
| 219209_at    | IFIH1     | 9,1 | up   | interferon induced with helicase C domain 1                                               |
| 230252_at    | GPR92     | 9,1 | up   | G protein-coupled receptor 92                                                             |
| 208079_s_at  | STK6      | 9,1 | down | serine/threonine kinase 6                                                                 |
| 238542_at    | ULBP2     | 9,1 | up   | UL16 binding protein 2                                                                    |
| 203665_at    | HMOX1     | 9,1 | up   | heme oxygenase (decycling) 1                                                              |
| 205990_s_at  | WNT5A     | 9,0 | up   | wingless-type MMTV integration site family, member 5A                                     |
| 228032_s_at  |           | 9,0 | up   | CDNA FLJ36663 fis, clone UTERU2002826                                                     |
| 218854_at    | SART2     | 8,9 | up   | squamous cell carcinoma antigen recognized by T cells 2                                   |
| 208925_at    | C3orf4    | 8,9 | down | chromosome 3 open reading frame 4                                                         |
| 225056_at    | SIPA1L2   | 8,8 | up   | signal-induced proliferation-associated 1 like 2                                          |
| 226215_s_at  | FBXL10    | 8,8 | up   | F-box and leucine-rich repeat protein 10                                                  |
| 228115_at    |           | 8,8 | up   | Transcribed locus                                                                         |
| 203967_at    | CDC6      | 8,8 | down | CDC6 cell division cycle 6 homolog (S, cerevisiae)                                        |
| 230645_at    | FRMD3     | 8,7 | up   | FERM domain containing 3                                                                  |
| 55065_at     | MARK4     | 8,7 | up   | MAP/microtubule affinity-regulating kinase 4                                              |
| 211126_s_at  | CSRP2     | 8,7 | up   | cysteine and glycine-rich protein 2                                                       |
| 226982_at    | ELL2      | 8,6 | up   | elongation factor, RNA polymerase II, 2                                                   |
| 217923_at    | PEF1      | 8,6 | down | penta-EF-hand domain containing 1                                                         |
| 202284_s_at  | CDKN1A    | 8,6 | up   | cyclin-dependent kinase inhibitor 1A (p21, Cip1)                                          |
| 205235_s_at  | MPHOSPH1  | 8,5 | down | M-phase phosphoprotein 1                                                                  |
| 212799_at    | STX6      | 8,5 | up   | syntaxin 6                                                                                |
| 212907_at    | SLC30A1   | 8,5 | up   | Solute carrier family 30 (zinc transporter), member 1                                     |
| 206987_x_at  | FGF18     | 8,5 | up   | fibroblast growth factor 18                                                               |
| 221840_at    | PTPRE     | 8,4 | up   | protein tyrosine phosphatase, receptor type, E                                            |
| 209898_x_at  | ITSN2     | 8,4 | up   | intersectin 2                                                                             |
| 242693_at    | CDC2L5    | 8,4 | up   | Cell division cycle 2-like 5 (cholinesterase-related cell division controller)            |
| 203821_at    | HBEGF     | 8,3 | up   | heparin-binding EGF-like growth factor                                                    |
| 211029_x_at  | FGF18     | 8,2 | up   | fibroblast growth factor 18 /// fibroblast growth factor 18                               |
| 203068_at    | KLHL21    | 8,2 | up   | kelch-like 21 (Drosophila)                                                                |
| 211676_s_at  | IFNGR1    | 8,2 | down | interferon gamma receptor 1 /// interferon gamma receptor 1                               |
| 225878_at    | KIF1B     | 8,2 | up   | Kinesin family member 1B                                                                  |
| 211519_s_at  | KIF2C     | 8,1 | down | kinesin family member 2C                                                                  |
| 209890_at    | TSPAN5    | 8,1 | up   | tetraspanin 5 /// tetraspanin 5                                                           |
| 202157_s_at  | CUGBP2    | 8,1 | up   | CUG triplet repeat, RNA binding protein 2                                                 |
| 228959_at    |           | 8,0 | up   | CDNA clone IMAGE:5262734                                                                  |
| 204254_s_at  | VDR       | 8,0 | up   | vitamin D (1,25-dihydroxyvitamin D3) receptor                                             |
| 205439_at    | GSTT2     | 8,0 | up   | glutathione S-transferase theta 2                                                         |
| 221646_s_at  | ZDHHC11   | 7,9 | up   | zinc finger, DHHC-type containing 11                                                      |
| 211240_x_at  | CTNND1    | 7,9 | down | catenin (cadherin-associated protein), delta 1                                            |
| 212077_at    | CALD1     | 7,9 | up   | caldesmon 1                                                                               |
| 203324_s_at  | CAV2      | 7,9 | up   | caveolin 2                                                                                |
| 210026_s_at  | CARD10    | 7,8 | up   | caspase recruitment domain family, member 10                                              |
| 203966_s_at  | PPM1A     | 7,7 | up   | 2C), magnesium-dependent, alpha isoform                                                   |
| 219155_at    | PITPNC1   | 7,7 | up   | phosphatidylinositol transfer protein, cytoplasmic 1                                      |
| 226099_at    | ELL2      | 7,6 | up   | elongation factor, RNA polymerase II, 2                                                   |
| 214104_at    | GPR161    | 7,6 | up   | G protein-coupled receptor 161                                                            |
| 222111_at    | KIAA1164  | 7,6 | up   | Family with sequence similarity 63, member B                                              |
| 223314_at    | TSPAN14   | 7,6 | up   | tetraspanin 14                                                                            |
| 206188_at    | ZNF623    | 7,6 | up   | zinc finger protein 623                                                                   |
| 210053_at    | TAF5      | 7,6 | up   | TAF5 RNA polymerase II, TATA box binding protein (TBP)-associated factor, 100kDa          |
| 226188_at    | HSPC159   | 7,5 | up   | HSPC159 protein                                                                           |
| 204567_s_at  | ABCG1     | 7,5 | up   | ATP-binding cassette, sub-family G (WHITE), member 1                                      |
| 218764_at    | PRKCH     | 7,5 | up   | protein kinase C, eta                                                                     |
| 212964_at    | HIC2      | 7,5 | up   | hypermethylated in cancer 2                                                               |
| 233555_s_at  | SULF2     | 7,5 | up   | sulfatase 2                                                                               |
| 242931_at    |           | 7,4 | up   | Transcribed locus                                                                         |
| 219696_at    | FLJ20054  | 7,4 | up   | hypothetical protein FLJ20054                                                             |
| 202464_s_at  | PFKFB3    | 7,4 | up   | 6-phosphofructo-2-kinase/fructose-2,6-biphosphatase 3                                     |
| 231090_s_at  | ARID2     | 7,4 | up   | AT rich interactive domain 2 (ARID, RFX-like)                                             |
| 226968_at    | KIF1B     | 7,4 | up   | kinesin family member 1B                                                                  |
| 202488_s_at  | FXYD3     | 7,4 | up   | FXYD domain containing ion transport regulator 3                                          |
| 227345_at    | TNFRSF10D | 7,4 | up   | tumor necrosis factor receptor superfamily, member 10d, decoy with truncated death domain |
| 201555_at    | MCM3      | 7,4 | down | MCM3 minichromosome maintenance deficient 3 (S, cerevisiae)                               |
| 205074_at    | SLC22A5   | 7,4 | up   | solute carrier family 22 (organic cation transporter), member 5                           |
| 226121_at    | MGC23280  | 7,3 | up   | hypothetical protein MGC23280                                                             |
| 219340_s_at  | CLN8      | 7,3 | up   | ceroid-lipofuscinosis, neuronal 8 (epilepsy, progressive with mental retardation)         |
| 211712_s_at  | ANXA9     | 7,3 | up   | annexin A9 /// annexin A9                                                                 |
| 239934_x_at  |           | 7,3 | up   | Homo sapiens, clone IMAGE:4865533, mRNA                                                   |
| 227194_at    | FAM3B     | 7,2 | up   | family with sequence similarity 3, member B                                               |
| 237400_at    | ATP5S     | 7,2 | up   | ATP synthase, H+ transporting, mitochondrial F0 complex, subunit s (factor B)             |
| 219165_at    | PDLIM2    | 7,2 | up   | PDZ and LIM domain 2 (mystique)                                                           |
| 241342_at    | TMEM65    | 7,2 | up   | transmembrane protein 65                                                                  |

|              |              |     |      |                                                                                                      |
|--------------|--------------|-----|------|------------------------------------------------------------------------------------------------------|
| 201368_at    | ZFP36L2      | 7,2 | up   | zinc finger protein 36, C3H type-like 2                                                              |
| 218988_at    | SLC35E3      | 7,1 | up   | solute carrier family 35, member E3                                                                  |
| 223474_at    | C14orf4      | 7,1 | up   | chromosome 14 open reading frame 4                                                                   |
| 203627_at    | IGF1R        | 7,1 | up   | Insulin-like growth factor 1 receptor                                                                |
| 213435_at    | SATB2        | 7,1 | down | SATB family member 2                                                                                 |
| 221858_at    | TBC1D12      | 7,1 | up   | TBC1 domain family, member 12                                                                        |
| 1556744_a_at | LOC440971    | 7,1 | up   | similar to Zinc finger protein Rlf (Rearranged L-myc fusion gene protein) (Zn-15 related protein)    |
| 212942_s_at  | KIAA1199     | 7,1 | up   | KIAA1199                                                                                             |
| 224516_s_at  | CXXC5        | 7,0 | up   | CXXC finger 5 /// CXXC finger 5                                                                      |
| 228452_at    | C17orf39     | 7,0 | up   | chromosome 17 open reading frame 39                                                                  |
| 223081_at    | PHF23        | 7,0 | down | PHD finger protein 23                                                                                |
| 205596_s_at  | SMURF2       | 7,0 | up   | SMAD specific E3 ubiquitin protein ligase 2                                                          |
| 203109_at    | UBE2M        | 7,0 | down | ubiquitin-conjugating enzyme E2M (UBC12 homolog, yeast)                                              |
| 240314_at    | NCOR1        | 6,9 | up   | Nuclear receptor co-repressor 1                                                                      |
| 212828_at    | SYNJ2        | 6,9 | up   | synaptojanin 2                                                                                       |
| 221245_s_at  | C2orf31      | 6,9 | up   | chromosome 2 open reading frame 31 /// chromosome 2 open reading frame 31                            |
| 213931_at    | ID2 /// ID2B | 6,9 | up   | negative helix-loop-helix protein                                                                    |
| 201473_at    | JUNB         | 6,9 | up   | jun B proto-oncogene                                                                                 |
| 204318_s_at  | GTSE1        | 6,9 | down | G-2 and S-phase expressed 1                                                                          |
| 209185_s_at  | IRS2         | 6,9 | up   | insulin receptor substrate 2                                                                         |
| 212256_at    | GALNT10      | 6,8 | up   | UDP-N-acetyl-alpha-D-galactosamine:polypeptide N-acetylgalactosaminyltransferase 10 (GalNac-T10)     |
| 206482_at    | PTK6         | 6,8 | up   | PTK6 protein tyrosine kinase 6                                                                       |
| 213212_x_at  | LOC161527    | 6,8 | up   | hypothetical protein LOC161527                                                                       |
| 231875_at    | KIF21A       | 6,8 | up   | kinesin family member 21A                                                                            |
| 202286_s_at  | TACSTD2      | 6,8 | up   | tumor-associated calcium signal transducer 2                                                         |
| 210052_s_at  | TPX2         | 6,8 | down | TPX2, microtubule-associated, homolog (Xenopus laevis)                                               |
| 242463_x_at  | ZNF600       | 6,7 | up   | zinc finger protein 600                                                                              |
| 209735_at    | ABCG2        | 6,7 | up   | ATP-binding cassette, sub-family G (WHITE), member 2                                                 |
| 201853_s_at  | CDC25B       | 6,7 | down | cell division cycle 25B                                                                              |
| 222829_s_at  | IL20RA       | 6,7 | up   | interleukin 20 receptor, alpha                                                                       |
| 203735_x_at  | PTPRF        | 6,7 | down | PTPRF interacting protein, binding protein 1 (liprin beta 1)                                         |
| 212239_at    | PIK3R1       | 6,7 | up   | phosphoinositide-3-kinase, regulatory subunit 1 (p85 alpha)                                          |
| 218718_at    | PDGFC        | 6,7 | up   | platelet derived growth factor C                                                                     |
| 204516_at    | ATXN7        | 6,7 | up   | ataxin 7                                                                                             |
| 218346_s_at  | SESN1        | 6,7 | up   | sestrin 1                                                                                            |
| 214965_at    | MGC26885     | 6,7 | up   | hypothetical protein MGC26885                                                                        |
| 1557522_x_at |              | 6,7 | up   | CDNA clone IMAGE:5311184                                                                             |
| 1552619_a_at | ANLN         | 6,7 | down | anillin, actin binding protein (scraps homolog, Drosophila)                                          |
| 219918_s_at  | ASPM         | 6,7 | down | asp (abnormal spindle)-like, microcephaly associated (Drosophila)                                    |
| 214663_at    | RIPK5        | 6,7 | up   | receptor interacting protein kinase 5                                                                |
| 206652_at    | ZMYM5        | 6,6 | up   | zinc finger, MYM-type 5                                                                              |
| 227404_s_at  | EGR1         | 6,6 | up   | Early growth response 1                                                                              |
| 232202_at    |              | 6,6 | up   | CDNA: FLJ21274 fis, clone COL01781                                                                   |
| 238480_at    | 18 open      | 6,6 | up   | Chromosome 18 open reading frame 50                                                                  |
| 202158_s_at  | CUGBP2       | 6,6 | up   | CUG triplet repeat, RNA binding protein 2                                                            |
| 209257_s_at  | CSPG6        | 6,6 | down | chondroitin sulfate proteoglycan 6 (bamacan)                                                         |
| 229114_at    | GAB1         | 6,6 | up   | GRB2-associated binding protein 1                                                                    |
| 204653_at    | TFAP2A       | 6,6 | up   | transcription factor AP-2 alpha (activating enhancer binding protein 2 alpha)                        |
| 227545_at    | BARD1        | 6,6 | down | BRCA1 associated RING domain 1                                                                       |
| 225834_at    | FAM72A       | 6,6 | down | family with sequence similarity 72, member A                                                         |
| 236718_at    |              | 6,6 | up   | Transcribed locus, weakly similar to NP_055301,1 neuronal thread protein AD7c-NTP [Homo sapiens]     |
| 238599_at    | IRAK1BP1     | 6,5 | up   | interleukin-1 receptor-associated kinase 1 binding protein 1                                         |
| 204768_s_at  | FEN1         | 6,5 | down | flap structure-specific endonuclease 1                                                               |
| 202364_at    | MXI1         | 6,5 | up   | MAX interactor 1 /// MAX interactor 1                                                                |
| 204148_s_at  | POMZP3       | 6,5 | up   | zona pellucida glycoprotein 3 (sperm receptor) /// POM (POM121 homolog, rat) and ZP3 fusion          |
| 226796_at    | LOC116236    | 6,5 | up   | hypothetical protein LOC116236                                                                       |
| 209712_at    | SLC35D1      | 6,4 | up   | solute carrier family 35 (UDP-glucuronic acid/UDP-N-acetylgalactosamine dual transporter), member D1 |
| 229893_at    | FRMD3        | 6,4 | up   | FERM domain containing 3                                                                             |
| 224793_s_at  | TGFBR1       | 6,4 | up   | transforming growth factor, beta receptor I (activin A receptor type II-like kinase, 53kDa)          |
| 226849_at    | DENND1A      | 6,4 | up   | DENN/MADD domain containing 1A                                                                       |
| 218009_s_at  | PRC1         | 6,4 | down | protein regulator of cytokinesis 1                                                                   |
| 219377_at    | FAM59A       | 6,4 | up   | family with sequence similarity 59, member A                                                         |
| 204496_at    | STRN3        | 6,4 | down | striatin, calmodulin binding protein 3                                                               |
| 219380_x_at  | POLH         | 6,3 | up   | polymerase (DNA directed), eta                                                                       |
| 1557701_s_at | POLH         | 6,3 | up   | polymerase (DNA directed), eta                                                                       |
| 222608_s_at  | ANLN         | 6,3 | down | anillin, actin binding protein (scraps homolog, Drosophila)                                          |
| 222740_at    | ATAD2        | 6,3 | down | ATPase family, AAA domain containing 2                                                               |
| 209339_at    | SIAH2        | 6,3 | up   | seven in absentia homolog 2 (Drosophila) /// seven in absentia homolog 2 (Drosophila)                |
| 228005_at    | ZXDB         | 6,3 | up   | zinc finger, X-linked, duplicated B                                                                  |
| 221864_at    | MGC13024     | 6,3 | up   | hypothetical protein MGC13024                                                                        |
| 204373_s_at  | CAP350       | 6,2 | up   | centrosome-associated protein 350                                                                    |
| 226002_at    | GAB1         | 6,2 | up   | GRB2-associated binding protein 1                                                                    |
| 232645_at    | LOC153684    | 6,2 | up   | hypothetical protein LOC153684                                                                       |
| 227492_at    |              | 6,2 | down | Transcribed locus, moderately similar to NP_689672,2 hypothetical protein MGC45438 [Homo sapiens]    |
| 56256_at     | SIDT2        | 6,2 | up   | SID1 transmembrane family, member 2                                                                  |
| 212653_s_at  | EHBP1        | 6,2 | down | EH domain binding protein 1                                                                          |
| 1553528_a_at | TAF5         | 6,1 | up   | TAF5 RNA polymerase II, TATA box binding protein (TBP)-associated factor, 100kDa                     |
| 244828_x_at  | LOC92345     | 6,1 | down | hypothetical protein BC008207                                                                        |
| 211675_s_at  | MDFIC        | 6,1 | up   | MyoD family inhibitor domain containing /// MyoD family inhibitor domain containing                  |
| 204326_x_at  | MT1X         | 6,1 | up   | metallothionein 1X                                                                                   |
| 205087_at    | RWDD3        | 6,1 | up   | RWD domain containing 3                                                                              |



|              |           |     |      |                                                                                                   |
|--------------|-----------|-----|------|---------------------------------------------------------------------------------------------------|
| 215101_s_at  | CXCL5     | 6,1 | down | chemokine (C-X-C motif) ligand 5                                                                  |
| 201020_at    | YWHAH     | 6,1 | down | tyrosine 3-monooxygenase/tryptophan 5-monooxygenase activation protein, eta polypeptide           |
| 225711_at    | ARL6IP6   | 6,1 | down | ADP-ribosylation-like factor 6 interacting protein 6                                              |
| 228155_at    | C10orf58  | 6,1 | up   | chromosome 10 open reading frame 58                                                               |
| 1556385_at   | CLC       | 6,1 | up   | Cardiotrophin-like cytokine factor 1                                                              |
| 227395_at    | MGC10233  | 6,1 | up   | Leucine rich repeat containing 35                                                                 |
| 65588_at     | LOC388796 | 6,1 | down | hypothetical LOC388796                                                                            |
| 210910_s_at  | POMZP3    | 6,1 | up   | zona pellucida glycoprotein 3 (sperm receptor) /// POM (POM121 homolog, rat) and ZP3 fusion       |
| 227962_at    | ACOX1     | 6,0 | up   | Acyl-Coenzyme A oxidase 1, palmitoyl                                                              |
| 232014_at    | ZNF30     | 6,0 | up   | zinc finger protein 30 (KOX 28)                                                                   |
| 219736_at    | TRIM36    | 6,0 | up   | tripartite motif-containing 36                                                                    |
| 207154_at    | DIO3      | 6,0 | up   | deiodinase, iodothyronine, type III                                                               |
| 228573_at    | ANTXR2    | 6,0 | up   | Anthrax toxin receptor 2                                                                          |
| 212020_s_at  | MKI67     | 6,0 | down | antigen identified by monoclonal antibody Ki-67                                                   |
| 210878_s_at  | JMJD1B    | 6,0 | down | jumonji domain containing 1B                                                                      |
| 238121_at    |           | 6,0 | up   | CDNA FLJ26959 fis, clone SLV00568                                                                 |
| 227792_at    |           | 5,9 | up   | CDNA: FLJ22994 fis, clone KAT11918                                                                |
| 218782_s_at  | ATAD2     | 5,9 | down | ATPase family, AAA domain containing 2                                                            |
| 202289_s_at  | TACC2     | 5,9 | up   | transforming, acidic coiled-coil containing protein 2                                             |
| 209788_s_at  | ARTS-1    | 5,9 | up   | type 1 tumor necrosis factor receptor shedding aminopeptidase regulator                           |
| 218585_s_at  | DTL       | 5,9 | down | denticleless homolog (Drosophila)                                                                 |
| 1555996_s_at | EIF4A2    | 5,9 | down | eukaryotic translation initiation factor 4A, isoform 2                                            |
| 239571_at    | MEF2A     | 5,9 | up   | MADS box transcription enhancer factor 2, polypeptide A (myocyte enhancer factor 2A)              |
| 220934_s_at  | MGC3196   | 5,9 | down | hypothetical protein MGC3196                                                                      |
| 218603_at    | HECA      | 5,9 | up   | headcase homolog (Drosophila)                                                                     |
| 202672_s_at  | ATF3      | 5,9 | up   | activating transcription factor 3                                                                 |
| 238999_at    |           | 5,9 | up   | Transcribed locus                                                                                 |
| 234331_s_at  | NSE1      | 5,9 | up   | Family with sequence similarity 84, member A                                                      |
| 202013_s_at  | EXT2      | 5,8 | up   | exostosin (multiple) 2                                                                            |
| 225655_at    | UHRF1     | 5,8 | down | ubiquitin-like, containing PHD and RING finger domains, 1                                         |
| 241756_at    | SMARCA2   | 5,8 | up   | SWI/SNF related, matrix associated, actin dependent regulator of chromatin, subfamily a, member 2 |
| 222555_s_at  | MRPL44    | 5,8 | down | mitochondrial ribosomal protein L44                                                               |
| 217599_s_at  | MDFIC     | 5,8 | up   | MyoD family inhibitor domain containing                                                           |
| 221577_x_at  | GDF15     | 5,8 | down | growth differentiation factor 15                                                                  |
| 204444_at    | KIF11     | 5,8 | down | kinesin family member 11                                                                          |
| 204141_at    | TUBB2     | 5,8 | up   | tubulin, beta 2                                                                                   |
| 222958_s_at  | DEPDC1    | 5,8 | down | DEP domain containing 1                                                                           |
| 201780_s_at  | RNF13     | 5,8 | up   | ring finger protein 13                                                                            |
| 229711_s_at  | MGC5370   | 5,8 | up   | hypothetical protein MGC5370                                                                      |
| 203642_s_at  | COBLL1    | 5,7 | up   | COBL-like 1                                                                                       |
| 40420_at     | STK10     | 5,7 | up   | serine/threonine kinase 10                                                                        |
| 55081_at     | MICAL-L1  | 5,7 | up   | MICAL-like 1                                                                                      |
| 201416_at    | SOX4      | 5,7 | down | SRY (sex determining region Y)-box 4                                                              |
| 226208_at    | ZSWIM6    | 5,7 | up   | zinc finger, SWIM-type containing 6                                                               |
| 204641_at    | NEK2      | 5,7 | down | NIMA (never in mitosis gene a)-related kinase 2                                                   |
| 235763_at    | SLC44A5   | 5,7 | up   | solute carrier family 44, member 5                                                                |
| 206747_at    | KIAA0514  | 5,7 | up   | KIAA0514                                                                                          |
| 205756_s_at  | F8        | 5,7 | up   | coagulation factor VIII, procoagulant component (hemophilia A)                                    |
| 1555339_at   | RAP1A     | 5,7 | up   | RAP1A, member of RAS oncogene family                                                              |
| 228443_s_at  | SET8      | 5,7 | up   | PR/SET domain containing protein 8                                                                |
| 219517_at    | ELL3      | 5,7 | up   | elongation factor RNA polymerase II-like 3                                                        |
| 47083_at     | C7orf26   | 5,6 | up   | chromosome 7 open reading frame 26                                                                |
| 1558019_at   | DST       | 5,6 | up   | Dystonin                                                                                          |
| 204128_s_at  | RFC3      | 5,6 | down | replication factor C (activator 1) 3, 38kDa                                                       |
| 212812_at    |           | 5,6 | up   | CDNA: FLJ22642 fis, clone HSI06970                                                                |
| 239503_at    |           | 5,6 | up   | CDNA clone IMAGE:5301910                                                                          |
| 225387_at    | TSPAN5    | 5,6 | up   | tetraspanin 5                                                                                     |
| 213647_at    | DNA2L     | 5,6 | down | DNA2 DNA replication helicase 2-like (yeast)                                                      |
| 31845_at     | ELF4      | 5,6 | up   | E74-like factor 4 (ets domain transcription factor)                                               |
| 209640_at    | PML       | 5,6 | up   | promyelocytic leukemia                                                                            |
| 1554678_s_at | HNRPDL    | 5,6 | down | heterogeneous nuclear ribonucleoprotein D-like                                                    |
| 201924_at    | AFF1      | 5,6 | up   | AF4/FMR2 family, member 1                                                                         |
| 209408_at    | KIF2C     | 5,6 | down | kinesin family member 2C                                                                          |
| 205111_s_at  | PLCE1     | 5,6 | up   | phospholipase C, epsilon 1                                                                        |
| 202131_s_at  | RIOK3     | 5,6 | up   | RIO kinase 3 (yeast) /// RIO kinase 3 (yeast)                                                     |
| 208944_at    | TGFBR2    | 5,6 | down | transforming growth factor, beta receptor II (70/80kDa)                                           |
| 202657_s_at  | SERTAD2   | 5,5 | up   | SERTA domain containing 2                                                                         |
| 232511_at    | RANBP2L1  | 5,5 | up   | RAN binding protein 2-like 1                                                                      |
| 218297_at    | C10orf97  | 5,5 | up   | chromosome 10 open reading frame 97                                                               |
| 210609_s_at  | TP53I3    | 5,5 | up   | tumor protein p53 inducible protein 3                                                             |
| 204780_s_at  | FAS       | 5,5 | up   | Fas (TNF receptor superfamily, member 6)                                                          |
| 218411_s_at  | MBIP      | 5,5 | down | MAP3K12 binding inhibitory protein 1                                                              |
| 207828_s_at  | CENPF     | 5,5 | down | centromere protein F, 350/400ka (mitosin)                                                         |
| 203935_at    | ACVR1     | 5,5 | up   | activin A receptor, type I                                                                        |
| 238156_at    | RPS6      | 5,5 | down | Ribosomal protein S6                                                                              |
| 221685_s_at  | FLJ20364  | 5,5 | down | hypothetical protein FLJ20364                                                                     |
| 241348_at    | ZNF654    | 5,4 | up   | Zinc finger protein 654                                                                           |
| 1555007_s_at | WDR66     | 5,4 | up   | WD repeat domain 66                                                                               |
| 208937_s_at  | ID1       | 5,4 | down | inhibitor of DNA binding 1, dominant negative helix-loop-helix protein                            |
| 1555920_at   | CBX3      | 5,4 | down | Chromobox homolog 3 (HP1 gamma homolog, Drosophila)                                               |
| 214783_s_at  | ANXA11    | 5,4 | up   | annexin A11                                                                                       |

|              |            |     |      |                                                                                                 |
|--------------|------------|-----|------|-------------------------------------------------------------------------------------------------|
| 219032_x_at  | OPN3       | 5,4 | down | opsin 3 (encephalopsin, panopsin)                                                               |
| 238623_at    | MAP3K4     | 5,4 | up   | Mitogen-activated protein kinase kinase kinase 4                                                |
| 224618_at    |            | 5,4 | up   |                                                                                                 |
| 1564010_at   | ARTS-1     | 5,4 | up   | Type 1 tumor necrosis factor receptor shedding aminopeptidase regulator                         |
| 211778_s_at  | OVOL2      | 5,3 | up   | ovo-like 2 (Drosophila) /// ovo-like 2 (Drosophila)                                             |
| 223182_s_at  | AGPAT3     | 5,3 | up   | 1-acylglycerol-3-phosphate O-acyltransferase 3                                                  |
| 212507_at    | RW1        | 5,3 | up   | RW1 protein                                                                                     |
| 218897_at    | MGC10993   | 5,3 | down | hypothetical protein MGC10993                                                                   |
| 208750_s_at  | ARF1       | 5,3 | down | ADP-ribosylation factor 1                                                                       |
| 227949_at    | PHACTR3    | 5,3 | up   | phosphatase and actin regulator 3                                                               |
| 38158_at     | ESPL1      | 5,3 | down | extra spindle poles like 1 (S, cerevisiae)                                                      |
| 214710_s_at  | CCNB1      | 5,3 | down | cyclin B1                                                                                       |
| 217824_at    | UBE2J1     | 5,3 | up   | ubiquitin-conjugating enzyme E2, J1 (UBC6 homolog, yeast)                                       |
| 221935_s_at  | AER61      | 5,3 | up   | AER61 glycosyltransferase                                                                       |
| 227178_at    | CUGBP2     | 5,3 | up   | CUG triplet repeat, RNA binding protein 2                                                       |
| 209784_s_at  | JAG2       | 5,3 | up   | jagged 2                                                                                        |
| 212558_at    | SPRY1      | 5,3 | up   | sprouty homolog 1, antagonist of FGF signaling (Drosophila)                                     |
| 1558017_s_at | PAWR       | 5,3 | up   | PRKC, apoptosis, WT1, regulator                                                                 |
| 209067_s_at  | HNRPDL     | 5,2 | down | heterogeneous nuclear ribonucleoprotein D-like                                                  |
| 226347_at    |            | 5,2 | up   |                                                                                                 |
| 221773_at    | ELK3       | 5,2 | up   | ELK3, ETS-domain protein (SRF accessory protein 2)                                              |
| 203528_at    | SEMA4D     | 5,2 | up   | (semaphorin) 4D                                                                                 |
| 231873_at    | BMPR2      | 5,2 | up   | bone morphogenetic protein receptor, type II (serine/threonine kinase)                          |
| 1555340_x_at | RAP1A      | 5,2 | up   | RAP1A, member of RAS oncogene family                                                            |
| 226184_at    | FMNL2      | 5,1 | up   | formin-like 2                                                                                   |
| 225088_at    | FLJ31153   | 5,1 | down | hypothetical protein FLJ31153                                                                   |
| 212959_s_at  | GNPTAB     | 5,1 | up   | N-acetylglucosamine-1-phosphate transferase, alpha and beta subunits                            |
| 218632_at    | HECTD3     | 5,1 | down | HECT domain containing 3                                                                        |
| 236251_at    | ITGAV      | 5,1 | up   | Integrin, alpha V (vitronectin receptor, alpha polypeptide, antigen CD51)                       |
| 221258_s_at  | KIF18A     | 5,1 | down | kinesin family member 18A /// kinesin family member 18A                                         |
| 226247_at    | PLEKHA1    | 5,1 | up   | pleckstrin homology domain containing, family A (phosphoinositide binding specific) member 1    |
| 225864_at    | FAM84B     | 5,1 | up   | family with sequence similarity 84, member B                                                    |
| 203755_at    | BUB1B      | 5,1 | down | BUB1 budding uninhibited by benzimidazoles 1 homolog beta (yeast)                               |
| 221957_at    | PDK3       | 5,1 | up   | Pyruvate dehydrogenase kinase, isoenzyme 3                                                      |
| 204917_s_at  | MLLT3      | 5,1 | down | myeloid/lymphoid or mixed-lineage leukemia (trithorax homolog, Drosophila); translocated to, 3  |
| 218294_s_at  | NUP50      | 5,1 | down | nucleoporin 50kDa                                                                               |
| 212193_s_at  | LARP1      | 5,0 | down | La ribonucleoprotein domain family, member 1                                                    |
| 206613_s_at  | TAF1A      | 5,0 | down | TATA box binding protein (TBP)-associated factor, RNA polymerase I, A, 48kDa                    |
| 224880_at    | RALA       | 5,0 | up   | v-ral simian leukemia viral oncogene homolog A (ras related)                                    |
| 207088_s_at  | SLC25A11   | 5,0 | down | solute carrier family 25 (mitochondrial carrier; oxoglutarate carrier), member 11               |
| 212989_at    | TMEM23     | 5,0 | up   | transmembrane protein 23                                                                        |
| 212522_at    | PDE8A      | 5,0 | up   | phosphodiesterase 8A                                                                            |
| 201804_x_at  | CKAP1      | 5,0 | down | cytoskeleton associated protein 1                                                               |
| 244312_at    | AFTIPHILIN | 5,0 | up   | Aftiphilin protein                                                                              |
| 203968_s_at  | CDC6       | 5,0 | down | CDC6 cell division cycle 6 homolog (S, cerevisiae)                                              |
| 202181_at    | KIAA0247   | 5,0 | up   | KIAA0247                                                                                        |
| 220172_at    | FLJ13096   | 5,0 | up   | hypothetical protein FLJ13096                                                                   |
| 202111_at    | SLC4A2     | 5,0 | down | solute carrier family 4, anion exchanger, member 2 (erythrocyte membrane protein band 3-like 1) |
| 217761_at    | MTCBP-1    | 5,0 | up   | membrane-type 1 matrix metalloproteinase cytoplasmic tail binding protein-1                     |
| 49111_at     |            | 5,0 | up   | MRNA; cDNA DKFZp762M127 (from clone DKFZp762M127)                                               |
| 201510_at    | ELF3       | 5,0 | up   | E74-like factor 3 (ets domain transcription factor, epithelial-specific )                       |
| 227787_s_at  | THRAP6     | 5,0 | down | thyroid hormone receptor associated protein 6                                                   |
| 209199_s_at  | MEF2C      | 5,0 | down | MADS box transcription enhancer factor 2, polypeptide C (myocyte enhancer factor 2C)            |
| 234192_s_at  | GKAP1      | 5,0 | up   | G kinase anchoring protein 1                                                                    |
| 203086_at    | KIF2       | 5,0 | down | Kinesin heavy chain member 2                                                                    |
| 229202_at    | PCNXL2     | 5,0 | up   | Pecanex-like 2 (Drosophila)                                                                     |
| 44040_at     | FBXO41     | 5,0 | up   | F-box protein 41                                                                                |
| 225342_at    | AK3L1      | 5,0 | up   | adenylate kinase 3-like 1                                                                       |
| 236545_at    | PPP3CA     | 5,0 | up   | Protein phosphatase 3 (formerly 2B), catalytic subunit, alpha isoform (calcineurin A alpha)     |
| 220161_s_at  | EPB41L4B   | 5,0 | up   | erythrocyte membrane protein band 4,1 like 4B                                                   |
| 225051_at    | EPB41      | 5,0 | up   | erythrocyte membrane protein band 4,1 (elliptocytosis 1, RH-linked)                             |
| 205414_s_at  | KIAA0672   | 4,9 | up   | KIAA0672 gene product                                                                           |
| 212508_at    | MOAP1      | 4,9 | up   | modulator of apoptosis 1                                                                        |
| 231866_at    | LNPEP      | 4,9 | up   | leucyl/cystinyl aminopeptidase                                                                  |
| 218172_s_at  | DERL1      | 4,9 | down | Der1-like domain family, member 1                                                               |
| 1559410_at   |            | 4,9 | up   | Transcribed locus                                                                               |
| 203180_at    | ALDH1A3    | 4,9 | up   | aldehyde dehydrogenase 1 family, member A3                                                      |
| 202307_s_at  | TAP1       | 4,9 | up   | transporter 1, ATP-binding cassette, sub-family B (MDR/TAP)                                     |
| 226003_at    | KIF21A     | 4,9 | up   | kinesin family member 21A                                                                       |
| 32094_at     | CHST3      | 4,9 | up   | carbohydrate (chondroitin 6) sulfotransferase 3                                                 |
| 229546_at    | FAM84A     | 4,9 | up   | family with sequence similarity 84, member A                                                    |
| 218796_at    | C20orf42   | 4,9 | up   | chromosome 20 open reading frame 42                                                             |
| 230021_at    | MGC45866   | 4,9 | down | leucine-rich repeat kinase 1                                                                    |
| 1557293_at   | LOC440993  | 4,9 | up   | hypothetical gene supported by AK128346                                                         |
| 218532_s_at  | FLJ20152   | 4,9 | up   | hypothetical protein FLJ20152                                                                   |
| 211548_s_at  | HPGD       | 4,9 | up   | hydroxyprostaglandin dehydrogenase 15-(NAD)                                                     |
| 222996_s_at  | CXXC5      | 4,9 | up   | CXXC finger 5                                                                                   |
| 232060_at    |            | 4,9 | up   | Full-length cDNA clone CS0DD009YB17 of Neuroblastoma Cot 50-normalized of Homo sapiens (human)  |
| 213317_at    | CLIC5      | 4,9 | up   | Chloride intracellular channel 5                                                                |
| 204331_s_at  | MRPS12     | 4,9 | down | mitochondrial ribosomal protein S12                                                             |
| 212925_at    | C19orf21   | 4,8 | down | chromosome 19 open reading frame 21                                                             |

|              |           |     |      |                                                                             |
|--------------|-----------|-----|------|-----------------------------------------------------------------------------|
| 218510_x_at  | FLJ20152  | 4,8 | up   | hypothetical protein FLJ20152                                               |
| 214833_at    | TMEM63A   | 4,8 | up   | transmembrane protein 63A                                                   |
| 209600_s_at  | ACOX1     | 4,8 | up   | acyl-Coenzyme A oxidase 1, palmitoyl                                        |
| 234723_x_at  |           | 4,8 | up   | CDNA: FLJ21228 fis, clone COL00739                                          |
| 214356_s_at  | KIAA0368  | 4,8 | up   | KIAA0368                                                                    |
| 209709_s_at  | HMMR      | 4,8 | down | hyaluronan-mediated motility receptor (RHAMM)                               |
| 1556060_a_at | KIAA1702  | 4,8 | up   | KIAA1702 protein                                                            |
| 231944_at    | ERO1LB    | 4,8 | up   | ERO1-like beta (S, cerevisiae)                                              |
| 218001_at    | MRPS2     | 4,8 | down | mitochondrial ribosomal protein S2                                          |
| 208581_x_at  | MT1X      | 4,8 | up   | metallothionein 1X                                                          |
| 214765_s_at  | ASAHL     | 4,8 | up   | N-acylsphingosine amidohydrolase (acid ceramidase)-like                     |
| 235072_s_at  |           | 4,8 | up   | Transcribed locus                                                           |
| 1560318_at   | ARHGAP29  | 4,8 | up   | Rho GTPase activating protein 29                                            |
| 226794_at    | STXBP5    | 4,8 | up   | syntaxin binding protein 5 (tomosyn)                                        |
| 235147_at    | LOC440928 | 4,8 | down | hypothetical gene supported by AK096649                                     |
| 203798_s_at  | VSNL1     | 4,8 | up   | visinin-like 1                                                              |
| 1569868_s_at | EME2      | 4,8 | up   | Essential meiotic endonuclease 1 homolog 2 (S, pombe)                       |
| 219322_s_at  | WDR8      | 4,7 | up   | WD repeat domain 8                                                          |
| 218319_at    | PELL1     | 4,7 | down | pellino homolog 1 (Drosophila)                                              |
| 226868_at    | LOC283464 | 4,7 | up   | hypothetical protein LOC283464                                              |
| 219041_s_at  | REPIN1    | 4,7 | up   | replication initiator 1                                                     |
| 212081_x_at  | BAT2      | 4,7 | down | HLA-B associated transcript 2                                               |
| 203418_at    | CCNA2     | 4,7 | down | cyclin A2                                                                   |
| 39248_at     | AQP3      | 4,7 | up   | aquaporin 3                                                                 |
| 241956_at    | PCGF5     | 4,7 | up   | Polycomb group ring finger 5                                                |
| 221587_s_at  | C19orf24  | 4,7 | down | chromosome 19 open reading frame 24                                         |
| 229231_at    | LRRRC37B  | 4,7 | up   | leucine rich repeat containing 37B                                          |
| 1555888_at   | EDD       | 4,7 | up   | E3 ubiquitin protein ligase, HECT domain containing, 1                      |
| 217811_at    | SELT      | 4,7 | down | selenoprotein T                                                             |
| 1557918_s_at | SLC16A1   | 4,7 | down | solute carrier family 16 (monocarboxylic acid transporters), member 1       |
| 225707_at    | ARL6IP6   | 4,7 | down | ADP-ribosylation-like factor 6 interacting protein 6                        |
| 231183_s_at  | JAG1      | 4,7 | up   | Jagged 1 (Alagille syndrome)                                                |
| 218501_at    | ARHGEF3   | 4,7 | up   | Rho guanine nucleotide exchange factor (GEF) 3                              |
| 203845_at    | PCAF      | 4,7 | up   | p300/CBP-associated factor                                                  |
| 212320_at    | TUBB      | 4,7 | down | tubulin, beta polypeptide                                                   |
| 227475_at    | FOXQ1     | 4,7 | up   | forkhead box Q1                                                             |
| 229498_at    |           | 4,7 | up   | MRNA; cDNA DKFZp779M2422 (from clone DKFZp779M2422)                         |
| 213757_at    | EIF5A     | 4,7 | up   | Eukaryotic translation initiation factor 5A                                 |
| 202606_s_at  | TLK1      | 4,7 | down | tousled-like kinase 1                                                       |
| 204106_at    | TESK1     | 4,7 | up   | testis-specific kinase 1                                                    |
| 43511_s_at   |           | 4,7 | up   | MRNA; cDNA DKFZp762M127 (from clone DKFZp762M127)                           |
| 219493_at    | SHCBP1    | 4,6 | down | SHC SH2-domain binding protein 1                                            |
| 222077_s_at  | RACGAP1   | 4,6 | down | Rac GTPase activating protein 1                                             |
| 217122_s_at  | SLC35E2   | 4,6 | down | solute carrier family 35, member E2                                         |
| 201963_at    | ACSL1     | 4,6 | up   | acyl-CoA synthetase long-chain family member 1                              |
| 225525_at    | KIAA1671  | 4,6 | up   | KIAA1671 protein                                                            |
| 223315_at    | NTN4      | 4,6 | up   | netrin 4                                                                    |
| 202149_at    | NEDD9     | 4,6 | up   | neural precursor cell expressed, developmentally down-regulated 9           |
| 214124_x_at  | FGFR1OP   | 4,6 | up   | FGFR1 oncogene partner                                                      |
| 212731_at    | ANKRD46   | 4,6 | up   | ankyrin repeat domain 46                                                    |
| 211759_x_at  | CKAP1     | 4,6 | down | cytoskeleton associated protein 1 /// cytoskeleton associated protein 1     |
| 204962_s_at  | CENPA     | 4,6 | down | centromere protein A, 17kDa                                                 |
| 218421_at    | CERK      | 4,6 | up   | ceramide kinase                                                             |
| 212754_s_at  | KIAA1040  | 4,6 | up   | KIAA1040 protein                                                            |
| 218875_s_at  | FBXO5     | 4,6 | down | F-box protein 5                                                             |
| 202107_s_at  | MCM2      | 4,6 | down | MCM2 minichromosome maintenance deficient 2, mitotin (S, cerevisiae)        |
| 205981_s_at  | ING2      | 4,6 | up   | inhibitor of growth family, member 2                                        |
| 216252_x_at  | FAS       | 4,6 | up   | Fas (TNF receptor superfamily, member 6)                                    |
| 239791_at    | HOXB6     | 4,6 | down | Homeo box B6                                                                |
| 228846_at    | MXD1      | 4,6 | up   | MAX dimerization protein 1                                                  |
| 236646_at    | FLJ31166  | 4,6 | down | hypothetical protein FLJ31166                                               |
| 224912_at    | TTC7A     | 4,6 | up   | tetratricopeptide repeat domain 7A                                          |
| 218036_x_at  | NMD3      | 4,6 | down | NMD3 homolog (S, cerevisiae)                                                |
| 41644_at     | SASH1     | 4,6 | up   | SAM and SH3 domain containing 1                                             |
| 226803_at    | CHMP4C    | 4,6 | up   | chromatin modifying protein 4C                                              |
| 209891_at    | SPBC25    | 4,6 | down | spindle pole body component 25 homolog (S, cerevisiae)                      |
| 221692_s_at  | MRPL34    | 4,6 | down | mitochondrial ribosomal protein L34 /// mitochondrial ribosomal protein L34 |
| 202894_at    | EPHB4     | 4,5 | up   | EPH receptor B4                                                             |
| 214126_at    | MCART1    | 4,5 | up   | Mitochondrial carrier triple repeat 1                                       |
| 219544_at    | FLJ22624  | 4,5 | down | FLJ22624 protein                                                            |
| 219502_at    | NEIL3     | 4,5 | down | nei endonuclease VIII-like 3 (E, coli)                                      |
| 226352_at    | JMY       | 4,5 | up   | Junction-mediating and regulatory protein                                   |
| 203650_at    | PROCR     | 4,5 | up   | protein C receptor, endothelial (EPCR)                                      |
| 1565886_at   | TRPM7     | 4,5 | up   | Transient receptor potential cation channel, subfamily M, member 7          |
| 227607_at    | AMSH-LP   | 4,5 | down | associated molecule with the SH3 domain of STAM (AMSH) like protein         |
| 225998_at    | GAB1      | 4,5 | up   | GRB2-associated binding protein 1                                           |
| 202183_s_at  | KIF22     | 4,5 | down | kinesin family member 22                                                    |
| 217850_at    | GNL3      | 4,5 | down | guanine nucleotide binding protein-like 3 (nucleolar)                       |
| 209259_s_at  | CSPG6     | 4,5 | down | chondroitin sulfate proteoglycan 6 (bamacan)                                |
| 235331_x_at  | PCGF5     | 4,5 | up   | polycomb group ring finger 5                                                |
| 204603_at    | EXO1      | 4,5 | down | exonuclease 1                                                               |

|              |           |     |      |                                                                                             |
|--------------|-----------|-----|------|---------------------------------------------------------------------------------------------|
| 212873_at    | HA-1      | 4,5 | up   | minor histocompatibility antigen HA-1                                                       |
| 226980_at    | DEPDC1B   | 4,5 | down | DEP domain containing 1B                                                                    |
| 200892_s_at  | SFRS10    | 4,5 | down | splicing factor, arginine/serine-rich 10 (transformer 2 homolog, Drosophila)                |
| 208765_s_at  | HNRPR     | 4,5 | down | heterogeneous nuclear ribonucleoprotein R                                                   |
| 209802_at    | PHLDA2    | 4,5 | up   | pleckstrin homology-like domain, family A, member 2                                         |
| 228638_at    | MGC34648  | 4,5 | up   | Family with sequence similarity 76, member A                                                |
| 214086_s_at  | PARP2     | 4,5 | down | poly (ADP-ribose) polymerase family, member 2                                               |
| 209357_at    | CITED2    | 4,5 | up   | Cbp/p300-interacting transactivator, with Glu/Asp-rich carboxy-terminal domain, 2           |
| 202531_at    | IRF1      | 4,5 | up   | interferon regulatory factor 1                                                              |
| 228523_at    | NANOS1    | 4,5 | up   | nanos homolog 1 (Drosophila)                                                                |
| 214696_at    | MGC14376  | 4,5 | up   | hypothetical protein MGC14376                                                               |
| 229644_at    | PREP      | 4,5 | up   | Prolyl endopeptidase                                                                        |
| 203367_at    | DUSP14    | 4,5 | up   | dual specificity phosphatase 14                                                             |
| 210317_s_at  | YWHAE     | 4,5 | down | tyrosine 3-monooxygenase/tryptophan 5-monooxygenase activation protein, epsilon polypeptide |
| 203492_x_at  | PIG8      | 4,5 | down | translokain                                                                                 |
| 203310_at    | STXBP3    | 4,5 | up   | syntaxin binding protein 3                                                                  |
| 230503_at    |           | 4,5 | up   | Transcribed locus                                                                           |
| 218456_at    | C1QDC1    | 4,4 | up   | C1q domain containing 1                                                                     |
| 207318_s_at  | CDC2L5    | 4,4 | up   | cell division cycle 2-like 5 (cholinesterase-related cell division controller)              |
| 226245_at    | KCTD1     | 4,4 | up   | potassium channel tetramerisation domain containing 1                                       |
| 233496_s_at  | CFL2      | 4,4 | down | cofilin 2 (muscle)                                                                          |
| 201933_at    | PCOLN3    | 4,4 | down | procollagen (type III) N-endopeptidase                                                      |
| 213139_at    | SNAI2     | 4,4 | up   | snail homolog 2 (Drosophila)                                                                |
| 204797_s_at  | EML1      | 4,4 | up   | echinoderm microtubule associated protein like 1                                            |
| 231764_at    | CHRAC1    | 4,4 | down | chromatin accessibility complex 1                                                           |
| 225897_at    | MARCKS    | 4,4 | down | Myristoylated alanine-rich protein kinase C substrate                                       |
| 201388_at    | PSMD3     | 4,4 | down | proteasome (prosome, macropain) 26S subunit, non-ATPase, 3                                  |
| 222998_at    | MAF1      | 4,4 | down | MAF1 homolog (S, cerevisiae)                                                                |
| 226649_at    | PANK1     | 4,4 | up   | pantothenate kinase 1                                                                       |
| 229223_at    | NFATC3    | 4,4 | up   | Nuclear factor of activated T-cells, cytoplasmic, calcineurin-dependent 3                   |
| 201673_s_at  | GYS1      | 4,4 | down | glycogen synthase 1 (muscle)                                                                |
| 227135_at    | ASAHL     | 4,4 | up   | N-acylsphingosine amidohydrolase (acid ceramidase)-like                                     |
| 231011_at    | FLJ10378  | 4,4 | up   | La ribonucleoprotein domain family, member 2                                                |
| 220295_x_at  | DEPDC1    | 4,4 | down | DEP domain containing 1                                                                     |
| 213478_at    | KIAA1026  | 4,4 | up   | kazrin                                                                                      |
| 1568619_s_at | LOC162073 | 4,4 | up   | Hypothetical protein LOC162073                                                              |
| 221014_s_at  | RAB33B    | 4,4 | up   | RAB33B, member RAS oncogene family /// RAB33B, member RAS oncogene family                   |
| 202446_s_at  | PLSCR1    | 4,4 | down | phospholipid scramblase 1                                                                   |
| 209862_s_at  | PIG8      | 4,4 | down | translokain                                                                                 |
| 225622_at    | PAG1      | 4,4 | up   | phosphoprotein associated with glycosphingolipid microdomains 1                             |
| 203087_s_at  | KIF2      | 4,4 | down | kinesin heavy chain member 2                                                                |
| 242225_at    | KIAA1040  | 4,4 | up   | KIAA1040 protein                                                                            |
| 228520_s_at  | APLP2     | 4,4 | up   | Amyloid beta (A4) precursor-like protein 2                                                  |
| 204030_s_at  | SCHIP1    | 4,3 | up   | schwannomin interacting protein 1                                                           |
| 227049_at    | ZADH2     | 4,3 | up   | zinc binding alcohol dehydrogenase, domain containing 2                                     |
| 212560_at    | C11orf32  | 4,3 | up   | chromosome 11 open reading frame 32                                                         |
| 226496_at    | ZCCHC7    | 4,3 | down | zinc finger, CCHC domain containing 7                                                       |
| 215719_x_at  | FAS       | 4,3 | up   | Fas (TNF receptor superfamily, member 6)                                                    |
| 244287_at    | SFRS12    | 4,3 | down | splicing factor, arginine/serine-rich 12                                                    |
| 225373_at    | C10orf54  | 4,3 | up   | chromosome 10 open reading frame 54                                                         |
| 230179_at    | LOC285812 | 4,3 | up   | hypothetical protein LOC285812                                                              |
| 214484_s_at  | OPRS1     | 4,3 | down | opioid receptor, sigma 1                                                                    |
| 204527_at    | MYO5A     | 4,3 | up   | myosin VA (heavy polypeptide 12, myosin)                                                    |
| 207319_s_at  | CDC2L5    | 4,3 | up   | cell division cycle 2-like 5 (cholinesterase-related cell division controller)              |
| 226178_at    | SOCS4     | 4,3 | up   | suppressor of cytokine signaling 4                                                          |
| 227761_at    | MYO5A     | 4,3 | up   | myosin VA (heavy polypeptide 12, myosin)                                                    |
| 238513_at    | PRRG4     | 4,3 | up   | Proline rich Gla (G-carboxyglutamic acid) 4 (transmembrane)                                 |
| 202318_s_at  | SENPE6    | 4,3 | up   | SUMO1/sentrin specific peptidase 6                                                          |
| 209092_s_at  | C17orf25  | 4,3 | down | chromosome 17 open reading frame 25                                                         |
| 225176_at    |           | 4,3 | up   | MSTP146 (MST146)                                                                            |
| 228559_at    |           | 4,3 | down | CDNA clone IMAGE:6043059                                                                    |
| 224663_s_at  | CFL2      | 4,3 | down | cofilin 2 (muscle)                                                                          |
| 202656_s_at  | SERTAD2   | 4,3 | up   | SERTA domain containing 2                                                                   |
| 204781_s_at  | FAS       | 4,3 | up   | Fas (TNF receptor superfamily, member 6)                                                    |
| 200704_at    | LITAF     | 4,3 | up   | lipopolysaccharide-induced TNF factor                                                       |
| 229194_at    | PCGF5     | 4,3 | up   | polycomb group ring finger 5                                                                |
| 203914_x_at  | HPGD      | 4,3 | up   | hydroxyprostaglandin dehydrogenase 15-(NAD)                                                 |
| 226873_at    | KIAA1164  | 4,3 | up   | Family with sequence similarity 63, member B                                                |
| 210407_at    | PPM1A     | 4,3 | up   | protein phosphatase 1A (formerly 2C), magnesium-dependent, alpha isoform                    |
| 224413_s_at  | TM2D2     | 4,3 | down | TM2 domain containing 2 /// TM2 domain containing 2                                         |
| 202257_s_at  | CD2BP2    | 4,3 | down | CD2 antigen (cytoplasmic tail) binding protein 2                                            |
| 217551_at    | LOC441453 | 4,3 | up   | similar to olfactory receptor, family 7, subfamily A, member 17                             |
| 210764_s_at  | CYR61     | 4,3 | down | cysteine-rich, angiogenic inducer, 61                                                       |
| 201692_at    | OPRS1     | 4,3 | down | opioid receptor, sigma 1                                                                    |
| 219001_s_at  | WDR32     | 4,3 | up   | WD repeat domain 32                                                                         |
| 212185_x_at  | MT2A      | 4,3 | up   | metallothionein 2A                                                                          |
| 228468_at    | MASTL     | 4,2 | down | microtubule associated serine/threonine kinase-like                                         |
| 212367_at    | FEM1B     | 4,2 | up   | fem-1 homolog b (C, elegans)                                                                |
| 203023_at    | HSPC111   | 4,2 | down | hypothetical protein HSPC111                                                                |
| 216511_s_at  | TCF7L2    | 4,2 | down | transcription factor 7-like 2 (T-cell specific, HMG-box)                                    |
| 238846_at    | TNFRSF11A | 4,2 | up   | tumor necrosis factor receptor superfamily, member 11a, NFkB activator                      |

|              |           |     |      |                                                                                      |
|--------------|-----------|-----|------|--------------------------------------------------------------------------------------|
| 227528_s_at  | MLL2      | 4,2 | down | myeloid/lymphoid or mixed-lineage leukemia 2                                         |
| 1565269_s_at | ATF1      | 4,2 | down | activating transcription factor 1                                                    |
| 224826_at    | KIAA1434  | 4,2 | up   | hypothetical protein KIAA1434                                                        |
| 207165_at    | HMMR      | 4,2 | down | hyaluronan-mediated motility receptor (RHAMM)                                        |
| 200990_at    | TRIM28    | 4,2 | down | tripartite motif-containing 28                                                       |
| 214684_at    | MEF2A     | 4,2 | up   | MADS box transcription enhancer factor 2, polypeptide A (myocyte enhancer factor 2A) |
| 237465_at    | LOC401151 | 4,2 | up   | hypothetical gene supported by BC062741                                              |
| 227036_at    |           | 4,2 | up   | Transcribed locus                                                                    |
| 228108_at    |           | 4,2 | up   | CDNA FLJ30761 fis, clone FEBRA2000538                                                |
| 220007_at    | FLJ13984  | 4,2 | up   | hypothetical protein FLJ13984                                                        |
| 212552_at    | HPCAL1    | 4,2 | up   | hippocalcin-like 1                                                                   |
| 225808_at    | LOC124512 | 4,2 | down | Hypothetical protein LOC124512                                                       |
| 208808_s_at  | HMGB2     | 4,2 | down | high-mobility group box 2                                                            |
| 228106_at    | FLJ20280  | 4,2 | down | hypothetical protein FLJ20280                                                        |
| 202530_at    | MAPK14    | 4,2 | up   | mitogen-activated protein kinase 14                                                  |
| 209464_at    | AURKB     | 4,2 | down | aurora kinase B                                                                      |
| 219911_s_at  | SLCO4A1   | 4,2 | up   | solute carrier organic anion transporter family, member 4A1                          |
| 209258_s_at  | CSPG6     | 4,2 | down | chondroitin sulfate proteoglycan 6 (bamacan)                                         |
| 226447_at    | ASH1L     | 4,2 | up   | POU domain, class 6, transcription factor 1                                          |
| 212063_at    | CD44      | 4,2 | up   | CD44 antigen (homing function and Indian blood group system)                         |
| 210649_s_at  | ARID1A    | 4,2 | down | AT rich interactive domain 1A (SWI-like)                                             |
| 224452_s_at  | MGC12966  | 4,2 | up   | hypothetical protein MGC12966 /// hypothetical protein MGC12966                      |
| 200900_s_at  | M6PR      | 4,2 | down | mannose-6-phosphate receptor (cation dependent)                                      |
| 1554038_at   | LARP2     | 4,2 | up   | La ribonucleoprotein domain family, member 2                                         |
| 224606_at    | KLF6      | 4,2 | down | Kruppel-like factor 6                                                                |
| 230559_x_at  | FGD4      | 4,2 | up   | FYVE, RhoGEF and PH domain containing 4                                              |
| 209295_at    | TNFRSF10B | 4,2 | up   | tumor necrosis factor receptor superfamily, member 10b                               |
| 1555780_a_at | RHEB      | 4,2 | down | Ras homolog enriched in brain                                                        |
| 227123_at    | RAB3B     | 4,2 | up   | RAB3B, member RAS oncogene family                                                    |
| 203564_at    | FANCG     | 4,2 | down | Fanconi anemia, complementation group G                                              |
| 91684_g_at   | EXOSC4    | 4,2 | down | exosome component 4                                                                  |
| 202006_at    | PTPN12    | 4,2 | down | protein tyrosine phosphatase, non-receptor type 12                                   |
| 213880_at    | LGR5      | 4,2 | down | leucine-rich repeat-containing G protein-coupled receptor 5                          |
| 227569_at    | LNX2      | 4,2 | up   | ligand of numb-protein X 2                                                           |
| 227143_s_at  | BID       | 4,2 | up   | BH3 interacting domain death agonist                                                 |
| 242245_at    | FLJ13815  | 4,2 | up   | Synapse defective 1, Rho GTPase, homolog 2 (C, elegans)                              |
| 223286_at    | DERP6     | 4,2 | down | S-phase 2 protein                                                                    |
| 224944_at    | TMPO      | 4,2 | down | Thymopoietin                                                                         |
| 227146_at    | QSCN6L1   | 4,2 | up   | quiescin Q6-like 1                                                                   |
| 205195_at    | AP1S1     | 4,2 | down | adaptor-related protein complex 1, sigma 1 subunit                                   |
| 226685_at    | SNTB2     | 4,2 | up   | Syntrophin, beta 2 (dystrophin-associated protein A1, 59kDa, basic component 2)      |
| 223895_s_at  | EPN3      | 4,1 | up   | epsin 3                                                                              |
| 236248_x_at  | MGC21874  | 4,1 | up   | transcriptional adaptor 2 (ADA2 homolog, yeast)-beta                                 |
| 201236_s_at  | BTG2      | 4,1 | up   | BTG family, member 2                                                                 |
| 214429_at    | MTMR6     | 4,1 | up   | myotubularin related protein 6                                                       |
| 229265_at    | DRPLA     | 4,1 | up   | Atrophia 1                                                                           |
| 219787_s_at  | ECT2      | 4,1 | down | epithelial cell transforming sequence 2 oncogene                                     |
| 211429_s_at  | SERPINA1  | 4,1 | up   | serpin peptidase inhibitor, clade A (alpha-1 antiproteinase, antitrypsin), member 1  |
| 222039_at    | LOC146909 | 4,1 | down | hypothetical protein LOC146909                                                       |
| 212240_s_at  | PIK3R1    | 4,1 | up   | phosphoinositide-3-kinase, regulatory subunit 1 (p85 alpha)                          |
| 223018_at    | NOB1P     | 4,1 | down | nin one binding protein                                                              |
| 225060_at    | LRP11     | 4,1 | up   | low density lipoprotein receptor-related protein 11                                  |
| 235299_at    |           | 4,1 | up   | troglydotes]                                                                         |
| 202600_s_at  | NRIP1     | 4,1 | up   | nuclear receptor interacting protein 1                                               |
| 202727_s_at  | IFNGR1    | 4,1 | down | interferon gamma receptor 1                                                          |
| 225807_at    | JUB       | 4,1 | up   | jub, ajuba homolog (Xenopus laevis)                                                  |
| 212870_at    | RASSF3    | 4,1 | up   | Ras association (RalGDS/AF-6) domain family 3                                        |
| 218360_at    | RAB22A    | 4,1 | down | RAB22A, member RAS oncogene family                                                   |
| 217640_x_at  | C18orf24  | 4,1 | down | chromosome 18 open reading frame 24                                                  |
| 219539_at    | GEMIN6    | 4,1 | down | gem (nuclear organelle) associated protein 6                                         |
| 229886_at    | FLJ32363  | 4,1 | down | FLJ32363 protein                                                                     |
| 208436_s_at  | IRF7      | 4,1 | up   | interferon regulatory factor 7                                                       |
| 225144_at    | BMPR2     | 4,1 | up   | bone morphogenetic protein receptor, type II (serine/threonine kinase)               |
| 212211_at    | ANKRD17   | 4,1 | down | ankyrin repeat domain 17                                                             |
| 32137_at     | JAG2      | 4,1 | up   | jagged 2                                                                             |
| 1554486_a_at | C6orf114  | 4,1 | up   | chromosome 6 open reading frame 114                                                  |
| 218491_s_at  | THY28     | 4,1 | down | thymocyte protein thy28                                                              |
| 36566_at     | CTNS      | 4,1 | down | cystinosis, nephropathic                                                             |
| 203016_s_at  | SSX2IP    | 4,0 | down | synovial sarcoma, X breakpoint 2 interacting protein                                 |
| 223758_s_at  | GTF2H2    | 4,0 | down | general transcription factor IIH, polypeptide 2, 44kDa                               |
| 235065_at    |           | 4,0 | up   | Transcribed locus                                                                    |
| 227481_at    | CNKSR3    | 4,0 | up   | CNKSR family member 3                                                                |
| 1554667_s_at | FLJ13984  | 4,0 | up   | hypothetical protein FLJ13984                                                        |
| 1554026_a_at | MYO10     | 4,0 | up   | Myosin X                                                                             |
| 233888_s_at  | SRGAP1    | 4,0 | up   | SLIT-ROBO Rho GTPase activating protein 1                                            |
| 219099_at    | C12orf5   | 4,0 | up   | chromosome 12 open reading frame 5                                                   |
| 203175_at    | RHOG      | 4,0 | down | ras homolog gene family, member G (rho G)                                            |
| 201087_at    | PXN       | 4,0 | down | paxillin                                                                             |
| 1555278_a_at | CKAP5     | 4,0 | down | cytoskeleton associated protein 5                                                    |
| 219922_s_at  | LTBP3     | 4,0 | up   | latent transforming growth factor beta binding protein 3                             |
| 226534_at    | KITLG     | 4,0 | up   | KIT ligand                                                                           |

|              |           |     |      |                                                                                              |
|--------------|-----------|-----|------|----------------------------------------------------------------------------------------------|
| 204278_s_at  | EBAG9     | 4,0 | down | estrogen receptor binding site associated, antigen, 9                                        |
| 225237_s_at  | MSI2      | 4,0 | down | musashi homolog 2 (Drosophila)                                                               |
| 229908_s_at  | GNPTG     | 4,0 | up   | N-acetylglucosamine-1-phosphate transferase, gamma subunit                                   |
| 235092_at    | KCTD1     | 4,0 | up   | Cytokine induced apoptosis inhibitor 1                                                       |
| 223279_s_at  | UACA      | 4,0 | down | uveal autoantigen with coiled-coil domains and ankyrin repeats                               |
| 225618_at    | ARHGAP27  | 4,0 | up   | Rho GTPase activating protein 27                                                             |
| 207574_s_at  | GADD45B   | 4,0 | up   | growth arrest and DNA-damage-inducible, beta                                                 |
| 214435_x_at  | RALA      | 4,0 | up   | v-ral simian leukemia viral oncogene homolog A (ras related)                                 |
| 226464_at    | MGC33365  | 4,0 | up   | hypothetical protein MGC33365                                                                |
| 219978_s_at  | NUSAP1    | 4,0 | down | nucleolar and spindle associated protein 1                                                   |
| 213358_at    | KIAA0802  | 4,0 | up   | KIAA0802                                                                                     |
| 222667_s_at  | ASH1L     | 4,0 | up   | ash1 (absent, small, or homeotic)-like (Drosophila)                                          |
| 201489_at    | PIIF      | 4,0 | down | peptidylprolyl isomerase F (cyclophilin F)                                                   |
| 223250_at    | KLHL7     | 4,0 | up   | kelch-like 7 (Drosophila)                                                                    |
| 239412_at    | IRF5      | 4,0 | up   | interferon regulatory factor 5                                                               |
| 238057_at    | USP45     | 4,0 | down | ubiquitin specific peptidase 45                                                              |
| 227105_at    | CSPP1     | 4,0 | down | centrosome and spindle pole associated protein 1                                             |
| 227396_at    |           | 4,0 | up   | Homo sapiens, clone IMAGE:4454331, mRNA                                                      |
| 204868_at    | ICT1      | 4,0 | down | immature colon carcinoma transcript 1                                                        |
| 225806_at    | JUB       | 4,0 | up   | jub, ajuba homolog (Xenopus laevis)                                                          |
| 209296_at    | PPM1B     | 4,0 | down | protein phosphatase 1B (formerly 2C), magnesium-dependent, beta isoform                      |
| 213353_at    | ABCA5     | 4,0 | up   | ATP-binding cassette, sub-family A (ABC1), member 5                                          |
| 213341_at    | FEM1C     | 4,0 | up   | fem-1 homolog c (C.elegans)                                                                  |
| 225976_at    | BTF3L4    | 4,0 | down | basic transcription factor 3-like 4                                                          |
| 227200_at    |           | 4,0 | up   | Transcribed locus                                                                            |
| 1553113_s_at | CDK8      | 4,0 | up   | Cyclin-dependent kinase 8                                                                    |
| 45633_at     | FLJ13912  | 4,0 | down | hypothetical protein FLJ13912                                                                |
| 226416_at    | THEX1     | 4,0 | down | three prime histone mRNA exonuclease 1                                                       |
| 234929_s_at  | SPATA7    | 4,0 | up   | spermatogenesis associated 7                                                                 |
| 226633_at    | RAB8B     | 4,0 | down | RAB8B, member RAS oncogene family                                                            |
| 219717_at    | FLJ20280  | 4,0 | down | hypothetical protein FLJ20280                                                                |
| 213225_at    | PPM1B     | 3,9 | down | protein phosphatase 1B (formerly 2C), magnesium-dependent, beta isoform                      |
| 205548_s_at  | BTG3      | 3,9 | down | BTG family, member 3                                                                         |
| 243780_at    |           | 3,9 | up   | CDNA FLJ46553 fis, clone THYMU3038879                                                        |
| 225287_s_at  | TMEM55B   | 3,9 | down | transmembrane protein 55B                                                                    |
| 224395_s_at  | RNF7      | 3,9 | down | ring finger protein 7 /// ring finger protein 7                                              |
| 1554345_a_at | FLJ20125  | 3,9 | down | hypothetical protein FLJ20125                                                                |
| 201578_at    | PODXL     | 3,9 | up   | podocalyxin-like                                                                             |
| 223427_s_at  | EPB41L4B  | 3,9 | up   | erythrocyte membrane protein band 4,1 like 4B                                                |
| 228255_at    | ALS2CR4   | 3,9 | up   | amyotrophic lateral sclerosis 2 (juvenile) chromosome region, candidate 4                    |
| 213140_s_at  | SS18L1    | 3,9 | up   | synovial sarcoma translocation gene on chromosome 18-like 1                                  |
| 227665_at    | MCART1    | 3,9 | up   | Mitochondrial carrier triple repeat 1                                                        |
| 203574_at    | NFIL3     | 3,9 | up   | nuclear factor, interleukin 3 regulated                                                      |
| 228145_s_at  | ZNF398    | 3,9 | up   | zinc finger protein 398                                                                      |
| 218607_s_at  | SDAD1     | 3,9 | down | SDA1 domain containing 1                                                                     |
| 234991_at    | MGC11349  | 3,9 | up   | ZXD family zinc finger C                                                                     |
| 219344_at    | SLC29A3   | 3,9 | up   | solute carrier family 29 (nucleoside transporters), member 3                                 |
| 228297_at    | CNN3      | 3,9 | up   | Calponin 3, acidic                                                                           |
| 235924_at    |           | 3,9 | up   | CDNA FLJ42287 fis, clone TLIVE2005866                                                        |
| 227247_at    | PLEKHA8   | 3,9 | up   | Pleckstrin homology domain containing, family A (phosphoinositide binding specific) member 8 |
| 201756_at    | RPA2      | 3,9 | down | replication protein A2, 32kDa                                                                |
| 236001_at    | LOC400573 | 3,9 | up   | hypothetical gene supported by BC015790; BC041634                                            |
| 224644_at    |           | 3,9 | down | CDNA clone IMAGE:5278517                                                                     |
| 209529_at    | PPAP2C    | 3,9 | down | phosphatidic acid phosphatase type 2C                                                        |
| 204778_x_at  | HOXB7     | 3,9 | down | homeo box B7                                                                                 |
| 218769_s_at  | ANKRA2    | 3,9 | up   | ankyrin repeat, family A (RFXANK-like), 2                                                    |
| 201617_x_at  | CALD1     | 3,9 | up   | caldesmon 1                                                                                  |
| 55692_at     | ELMO2     | 3,9 | up   | engulfment and cell motility 2 (ced-12 homolog, C, elegans)                                  |
| 214011_s_at  | HSPC111   | 3,9 | down | hypothetical protein HSPC111                                                                 |
| 209218_at    | SQLE      | 3,9 | down | squalene epoxidase                                                                           |
| 227897_at    | RAP2B     | 3,9 | up   | RAP2B, member of RAS oncogene family                                                         |
| 1561908_a_at | HS3ST3B1  | 3,9 | up   | Hypothetical protein MGC12916                                                                |
| 224571_at    | IRF2BP2   | 3,9 | up   | interferon regulatory factor 2 binding protein 2                                             |
| 229377_at    | GRTP1     | 3,9 | up   | Growth hormone regulated TBC protein 1                                                       |
| 225524_at    | ANTXR2    | 3,9 | up   | anthrax toxin receptor 2                                                                     |
| 41037_at     | TEAD4     | 3,9 | down | TEA domain family member 4                                                                   |
| 225049_at    | BLOC1S2   | 3,9 | up   | biogenesis of lysosome-related organelles complex-1, subunit 2                               |
| 204822_at    | TTK       | 3,9 | down | TTK protein kinase                                                                           |
| 207431_s_at  | DEGS1     | 3,9 | down | degenerative spermatocyte homolog 1, lipid desaturase (Drosophila)                           |
| 204667_at    | FOXA1     | 3,9 | down | forkhead box A1                                                                              |
| 224823_at    | MYLK      | 3,9 | up   | myosin, light polypeptide kinase                                                             |
| 203694_s_at  | DHX16     | 3,9 | down | DEAH (Asp-Glu-Ala-His) box polypeptide 16                                                    |
| 235023_at    | VPS13C    | 3,9 | up   | Vacuolar protein sorting 13C (yeast)                                                         |
| 227286_at    | FLJ90652  | 3,9 | down | hypothetical protein FLJ90652                                                                |
| 202724_s_at  | FOXO1A    | 3,9 | up   | forkhead box O1A (rhabdomyosarcoma)                                                          |
| 203156_at    | AKAP11    | 3,9 | down | A kinase (PRKA) anchor protein 11                                                            |
| 205895_s_at  | NOLC1     | 3,9 | down | nucleolar and coiled-body phosphoprotein 1                                                   |
| 218898_at    | FAM57A    | 3,9 | down | family with sequence similarity 57, member A                                                 |
| 225611_at    | MAST4     | 3,9 | up   | microtubule associated serine/threonine kinase family member 4                               |
| 224819_at    | TCEAL8    | 3,8 | down | transcription elongation factor A (SII)-like 8                                               |
| 212675_s_at  | KIAA0582  | 3,8 | up   | KIAA0582                                                                                     |

|              |           |     |      |                                                                                           |
|--------------|-----------|-----|------|-------------------------------------------------------------------------------------------|
| 201564_s_at  | FSCN1     | 3,8 | up   | fascin homolog 1, actin-bundling protein ( <i>Strongylocentrotus purpuratus</i> )         |
| 215204_at    | SENP6     | 3,8 | up   | SUMO1/sentrin specific peptidase 6                                                        |
| 219575_s_at  | COG8      | 3,8 | down | peptide deformylase-like protein /// component of oligomeric golgi complex 8              |
| 225022_at    | GOPC      | 3,8 | down | golgi associated PDZ and coiled-coil motif containing                                     |
| 203216_s_at  | MYO6      | 3,8 | up   | myosin VI                                                                                 |
| 215128_at    |           | 3,8 | up   | CDNA FLJ11682 fis, clone HEMBA1004880                                                     |
| 212021_s_at  | MKI67     | 3,8 | down | antigen identified by monoclonal antibody Ki-67                                           |
| 222680_s_at  | DTL       | 3,8 | down | denticleless homolog ( <i>Drosophila</i> )                                                |
| 202609_at    | EPS8      | 3,8 | up   | epidermal growth factor receptor pathway substrate 8                                      |
| 212832_s_at  | CKAP5     | 3,8 | down | cytoskeleton associated protein 5                                                         |
| 235410_at    | NPHP3     | 3,8 | up   | nephronophthisis 3 (adolescent)                                                           |
| 226551_at    | RIPK1     | 3,8 | up   | receptor (TNFRSF)-interacting serine-threonine kinase 1                                   |
| 211997_x_at  | H3F3B     | 3,8 | down | H3 histone, family 3B (H3,3B)                                                             |
| 213330_s_at  | STIP1     | 3,8 | down | stress-induced-phosphoprotein 1 (Hsp70/Hsp90-organizing protein)                          |
| 212030_at    | RBM25     | 3,8 | down | RNA binding motif protein 25                                                              |
| 227728_at    | PPM1A     | 3,8 | up   | Protein phosphatase 1A (formerly 2C), magnesium-dependent, alpha isoform                  |
| 1558761_a_at | C9orf100S | 3,8 | up   | chromosome 9 open reading frame 10 opposite strand                                        |
| 200998_s_at  | CKAP4     | 3,8 | down | cytoskeleton-associated protein 4                                                         |
| 206020_at    | SOCS6     | 3,8 | up   | suppressor of cytokine signaling 6                                                        |
| 1558834_s_at | C1orf62   | 3,8 | up   | chromosome 1 open reading frame 62                                                        |
| 225282_at    | SMAP1L    | 3,8 | up   | stromal membrane-associated protein 1-like                                                |
| 218205_s_at  | MKNK2     | 3,8 | up   | MAP kinase interacting serine/threonine kinase 2                                          |
| 226290_at    | BDP1      | 3,8 | up   | B double prime 1, subunit of RNA polymerase III transcription initiation factor IIIB      |
| 1558710_at   | ARIH1     | 3,8 | up   | Ariadne homolog, ubiquitin-conjugating enzyme E2 binding protein, 1 ( <i>Drosophila</i> ) |
| 241769_at    | ITGAV     | 3,8 | up   | Integrin, alpha V (vitronectin receptor, alpha polypeptide, antigen CD51)                 |
| 213149_at    | DLAT      | 3,8 | down | dihydrolipoamide S-acetyltransferase (E2 component of pyruvate dehydrogenase complex)     |
| 214723_x_at  | KIAA1641  | 3,8 | up   | KIAA1641                                                                                  |
| 219988_s_at  | C1orf164  | 3,8 | down | chromosome 1 open reading frame 164                                                       |
| 201993_x_at  | HNRPDL    | 3,8 | down | heterogeneous nuclear ribonucleoprotein D-like                                            |
| 36711_at     | MAFF      | 3,8 | up   | v-maf musculoaponeurotic fibrosarcoma oncogene homolog F (avian)                          |
| 213342_at    | YAP1      | 3,8 | up   | Yes-associated protein 1, 65kDa                                                           |
| 213649_at    | SFRS7     | 3,8 | down | splicing factor, arginine/serine-rich 7, 35kDa                                            |
| 223358_s_at  | PDE7A     | 3,8 | up   | Phosphodiesterase 7A                                                                      |
| 222622_at    | LOC283871 | 3,8 | down | hypothetical protein LOC283871                                                            |
| 229551_x_at  | ZNF367    | 3,8 | up   | zinc finger protein 367                                                                   |
| 228454_at    | MLR2      | 3,8 | up   | ligand-dependent corepressor                                                              |
| 221779_at    | MICAL-L1  | 3,8 | up   | MICAL-like 1                                                                              |
| 224896_s_at  | TTL       | 3,8 | up   | tubulin tyrosine ligase                                                                   |
| 204252_at    | CDK2      | 3,8 | down | cyclin-dependent kinase 2                                                                 |
| 209179_s_at  | LENG4     | 3,8 | down | leukocyte receptor cluster (LRC) member 4                                                 |
| 233849_s_at  | ARHGAP5   | 3,8 | down | Rho GTPase activating protein 5                                                           |
| 60474_at     | C20orf42  | 3,8 | up   | chromosome 20 open reading frame 42                                                       |
| 215785_s_at  | CYFIP2    | 3,8 | up   | cytoplasmic FMR1 interacting protein 2                                                    |
| 227318_at    |           | 3,8 | up   | MRNA; cDNA DKFZp547G036 (from clone DKFZp547G036)                                         |
| 201772_at    | AZIN1     | 3,8 | down | antizyme inhibitor 1                                                                      |
| 201875_s_at  | MPZL1     | 3,8 | down | myelin protein zero-like 1                                                                |
| 240633_at    | FLJ33718  | 3,8 | up   | hypothetical protein FLJ33718                                                             |
| 203493_s_at  | PIG8      | 3,8 | down | translokoin                                                                               |
| 202094_at    | BIRC5     | 3,8 | down | baculoviral IAP repeat-containing 5 (survivin)                                            |
| 220237_at    | ATG3      | 3,8 | up   | ATG3 autophagy related 3 homolog (S, cerevisiae)                                          |
| 203225_s_at  | RFK       | 3,8 | up   | riboflavin kinase                                                                         |
| 227087_at    | INPP4A    | 3,8 | up   | Inositol polyphosphate-4-phosphatase, type I, 107kDa                                      |
| 227280_s_at  | FLJ40432  | 3,8 | up   | Hypothetical protein FLJ40432                                                             |
| 218951_s_at  | PLCXD1    | 3,8 | up   | phosphatidylinositol-specific phospholipase C, X domain containing 1                      |
| 227943_at    | HIST2H2AA | 3,8 | up   | Histone 2, H2aa                                                                           |
| 206662_at    | GLRX      | 3,8 | down | glutaredoxin (thioltransferase)                                                           |
| 219654_at    | PTPLA     | 3,8 | up   | protein tyrosine phosphatase-like (proline instead of catalytic arginine), member a       |
| 201912_s_at  | GSPT1     | 3,7 | down | G1 to S phase transition 1 /// G1 to S phase transition 1                                 |
| 204176_at    | KLHL20    | 3,7 | up   | kelch-like 20 ( <i>Drosophila</i> )                                                       |
| 204045_at    | TCEAL1    | 3,7 | down | transcription elongation factor A (SII)-like 1                                            |
| 222108_at    | AMIGO2    | 3,7 | down | adhesion molecule with Ig-like domain 2                                                   |
| 218088_s_at  | RRAGC     | 3,7 | up   | Ras-related GTP binding C                                                                 |
| 227720_at    | ANKRD13B  | 3,7 | up   | ankyrin repeat domain 13B                                                                 |
| 222173_s_at  | TBC1D2    | 3,7 | up   | TBC1 domain family, member 2                                                              |
| 202261_at    | VPS72     | 3,7 | down | vacuolar protein sorting 72 (yeast)                                                       |
| 209920_at    | BMPR2     | 3,7 | up   | bone morphogenetic protein receptor, type II (serine/threonine kinase)                    |
| 218008_at    | FLJ10099  | 3,7 | down | hypothetical protein FLJ10099                                                             |
| 218138_at    | MKKS      | 3,7 | down | McKusick-Kaufman syndrome                                                                 |
| 225094_at    | SET8      | 3,7 | up   | PR/SET domain containing protein 8                                                        |
| 242241_x_at  |           | 3,7 | up   | Transcribed locus                                                                         |
| 207291_at    | PRRG4     | 3,7 | up   | proline rich Gla (G-carboxyglutamic acid) 4 (transmembrane)                               |
| 209792_s_at  | KLK10     | 3,7 | down | kallikrein 10                                                                             |
| 201225_s_at  | SRRM1     | 3,7 | down | serine/arginine repetitive matrix 1                                                       |
| 232890_at    |           | 3,7 | up   |                                                                                           |
| 1553764_a_at | JUB       | 3,7 | up   | jub, ajuba homolog ( <i>Xenopus laevis</i> )                                              |
| 201694_s_at  | EGR1      | 3,7 | up   | early growth response 1                                                                   |
| 228033_at    | E2F7      | 3,7 | up   | E2F transcription factor 7                                                                |
| 215954_s_at  | C19orf29  | 3,7 | down | chromosome 19 open reading frame 29                                                       |
| 201976_s_at  | MYO10     | 3,7 | up   | myosin X                                                                                  |
| 218105_s_at  | MRPL4     | 3,7 | down | mitochondrial ribosomal protein L4                                                        |
| 235952_at    |           | 3,7 | up   | Transcribed locus                                                                         |

|              |           |     |      |                                                                                  |
|--------------|-----------|-----|------|----------------------------------------------------------------------------------|
| 208842_s_at  | GORASP2   | 3,7 | down | golgi reassembly stacking protein 2, 55kDa                                       |
| 219215_s_at  | SLC39A4   | 3,7 | down | solute carrier family 39 (zinc transporter), member 4                            |
| 232451_at    |           | 3,7 | up   | MRNA; cDNA DKFZp564I0816 (from clone DKFZp564I0816)                              |
| 1557240_a_at | BBX       | 3,7 | up   | Bobby sox homolog (Drosophila)                                                   |
| 232209_x_at  | HM13      | 3,7 | down | histocompatibility (minor) 13                                                    |
| 211947_s_at  | BAT2D1    | 3,7 | down | BAT2 domain containing 1                                                         |
| 225889_at    | AEBP2     | 3,7 | down | AE binding protein 2                                                             |
| 227484_at    |           | 3,7 | up   | CDNA FLJ41690 fis, clone HCASM2009405                                            |
| 220386_s_at  | EML4      | 3,7 | down | echinoderm microtubule associated protein like 4                                 |
| 226399_at    | FLJ14281  | 3,7 | up   | DnaJ (Hsp40) homolog, subfamily B, member 14                                     |
| 228754_at    | SLC6A6    | 3,7 | up   | solute carrier family 6 (neurotransmitter transporter, taurine), member 6        |
| 202351_at    | ITGAV     | 3,7 | up   | integrin, alpha V (vitronectin receptor, alpha polypeptide, antigen CD51)        |
| 221538_s_at  | PLXNA1    | 3,7 | up   | plexin A1                                                                        |
| 209762_x_at  | SP110     | 3,7 | up   | SP110 nuclear body protein                                                       |
| 219221_at    | ZBTB38    | 3,7 | up   | zinc finger and BTB domain containing 38                                         |
| 37028_at     | PPP1R15A  | 3,7 | down | protein phosphatase 1, regulatory (inhibitor) subunit 15A                        |
| 214790_at    | SENP6     | 3,7 | up   | SUMO1/sentrin specific peptidase 6                                               |
| 201880_at    | ARIH1     | 3,7 | up   | Ariadne homolog, ubiquitin-conjugating enzyme E2 binding protein, 1 (Drosophila) |
| 212708_at    | LOC339287 | 3,7 | down | hypothetical protein LOC339287                                                   |
| 217821_s_at  | WBP11     | 3,7 | down | WW domain binding protein 11                                                     |
| 213226_at    | CCNA2     | 3,7 | down | Cyclin A2                                                                        |
| 203726_s_at  | LAMA3     | 3,7 | up   | laminin, alpha 3                                                                 |
| 207735_at    | RNF125    | 3,7 | up   | ring finger protein 125                                                          |
| 212614_at    | ARID5B    | 3,7 | up   | AT rich interactive domain 5B (MRF1-like)                                        |
| 230110_at    | MCOLN2    | 3,7 | up   | mucopolipin 2                                                                    |
| 205034_at    | CCNE2     | 3,7 | down | cyclin E2                                                                        |
| 230699_at    | PGLS      | 3,7 | up   | 6-phosphogluconolactonase                                                        |
| 218330_s_at  | NAV2      | 3,7 | up   | neuron navigator 2                                                               |
| 230893_at    | DNAJA5    | 3,7 | up   | DnaJ homology subfamily A member 5                                               |
| 215016_x_at  | DST       | 3,7 | up   | dystonin                                                                         |
| 225728_at    | IPO9      | 3,7 | up   | Importin 9                                                                       |
| 217995_at    | SQRDL     | 3,7 | up   | sulfide quinone reductase-like (yeast)                                           |
| 221139_s_at  | CSAD      | 3,6 | up   | cysteine sulfinic acid decarboxylase                                             |
| 221834_at    | SIAH1     | 3,6 | up   | Seven in absentia homolog 1 (Drosophila)                                         |
| 224407_s_at  | MASK      | 3,6 | down | Mst3 and SOK1-related kinase /// Mst3 and SOK1-related kinase                    |
| 227195_at    | ZNF503    | 3,6 | up   | zinc finger protein 503                                                          |
| 203089_s_at  | HTRA2     | 3,6 | down | HtrA serine peptidase 2                                                          |
| 212400_at    | C9orf132  | 3,6 | up   | chromosome 9 open reading frame 132                                              |
| 222558_at    | P15RS     | 3,6 | down | hypothetical protein FLJ10656                                                    |
| 240016_at    | SENP6     | 3,6 | up   | SUMO1/sentrin specific peptidase 6                                               |
| 208868_s_at  | GABARAPL1 | 3,6 | down | GABA(A) receptor-associated protein like 1                                       |
| 202337_at    | PMF1      | 3,6 | down | polyamine-modulated factor 1                                                     |
| 219342_at    | NBLA04196 | 3,6 | down | putative protein product of Nbla04196                                            |
| 226661_at    | CDCA2     | 3,6 | down | cell division cycle associated 2                                                 |
| 218309_at    | CAMK2N1   | 3,6 | up   | calcium/calmodulin-dependent protein kinase II inhibitor 1                       |
| 222690_s_at  | TMEM39A   | 3,6 | down | transmembrane protein 39A                                                        |
| 231148_at    | IGFL2     | 3,6 | down | insulin growth factor-like family member 2                                       |
| 1553603_s_at | ARL6IP2   | 3,6 | down | ADP-ribosylation factor-like 6 interacting protein 2                             |
| 236314_at    |           | 3,6 | up   | troglydotes]                                                                     |
| 207956_x_at  | APRIN     | 3,6 | down | androgen-induced proliferation inhibitor                                         |
| 204967_at    | APXL      | 3,6 | up   | apical protein-like (Xenopus laevis)                                             |
| 235505_s_at  |           | 3,6 | up   | MRNA full length insert cDNA clone EUROIMAGE 358906                              |
| 227804_at    | LOC116238 | 3,6 | up   | hypothetical protein BC014072                                                    |
| 203638_s_at  | FGFR2     | 3,6 | up   | dysostosis 1, Crouzon syndrome, Pfeiffer syndrome, Jackson-Weiss syndrome)       |
| 209267_s_at  | SLC39A8   | 3,6 | up   | solute carrier family 39 (zinc transporter), member 8                            |
| 223184_s_at  | AGPAT3    | 3,6 | up   | 1-acylglycerol-3-phosphate O-acyltransferase 3                                   |
| 238549_at    | CBFA2T2   | 3,6 | up   | core-binding factor, runt domain, alpha subunit 2; translocated to, 2            |
| 207598_x_at  | XRCC2     | 3,6 | down | X-ray repair complementing defective repair in Chinese hamster cells 2           |
| 219433_at    | BCOR      | 3,6 | up   | BCL6 co-repressor                                                                |
| 213143_at    | LOC257407 | 3,6 | up   | hypothetical protein LOC257407                                                   |
| 202034_x_at  | RB1CC1    | 3,6 | up   | RB1-inducible coiled-coil 1                                                      |
| 203641_s_at  | COBLL1    | 3,6 | up   | COBL-like 1                                                                      |
| 202597_at    | IRF6      | 3,6 | up   | interferon regulatory factor 6                                                   |
| 212556_at    | SCRIB     | 3,6 | up   | scribbled homolog (Drosophila)                                                   |
| 204352_at    | TRAF5     | 3,6 | up   | TNF receptor-associated factor 5                                                 |
| 211382_s_at  | TACC2     | 3,6 | up   | transforming, acidic coiled-coil containing protein 2                            |
| 203044_at    | CHSY1     | 3,6 | up   | carbohydrate (chondroitin) synthase 1                                            |
| 234923_at    | GARNL1    | 3,6 | up   | GTPase activating Rap/RanGAP domain-like 1                                       |
| 222201_s_at  | CASP8AP2  | 3,6 | down | CASP8 associated protein 2                                                       |
| 200895_s_at  | FKBP4     | 3,6 | down | FK506 binding protein 4, 59kDa                                                   |
| 217861_s_at  | PREB      | 3,6 | down | prolactin regulatory element binding                                             |
| 217832_at    | SYNCRIP   | 3,6 | down | synaptotagmin binding, cytoplasmic RNA interacting protein                       |
| 208313_s_at  | SF1       | 3,6 | down | splicing factor 1                                                                |
| 219274_at    | TSPAN12   | 3,6 | up   | tetraspanin 12                                                                   |
| 1568597_at   |           | 3,6 | up   | LOC441207                                                                        |
| 231894_at    | SARS      | 3,6 | up   | Seryl-tRNA synthetase                                                            |
| 33323_r_at   | SFN       | 3,6 | up   | stratifin                                                                        |
| 210962_s_at  | AKAP9     | 3,6 | up   | A kinase (PRKA) anchor protein (yotiao) 9                                        |
| 200623_s_at  | CALM3     | 3,6 | down | calmodulin 3 (phosphorylase kinase, delta)                                       |
| 218399_s_at  | CDCA4     | 3,6 | down | cell division cycle associated 4                                                 |
| 202721_s_at  | GFPT1     | 3,6 | down | glutamine-fructose-6-phosphate transaminase 1                                    |



|              |           |     |      |                                                                                        |
|--------------|-----------|-----|------|----------------------------------------------------------------------------------------|
| 201435_s_at  | EIF4E     | 3,6 | down | eukaryotic translation initiation factor 4E                                            |
| 228445_at    | AMID      | 3,6 | up   | apoptosis-inducing factor (AIF)-like mitochondrion-associated inducer of death         |
| 213501_at    | ACOX1     | 3,6 | up   | acyl-Coenzyme A oxidase 1, palmitoyl                                                   |
| 224626_at    | SLC35A4   | 3,6 | down | solute carrier family 35, member A4                                                    |
| 238058_at    | LOC150381 | 3,6 | up   | hypothetical protein LOC150381                                                         |
| 227946_at    | OSBPL7    | 3,6 | up   | oxysterol binding protein-like 7                                                       |
| 218336_at    | PFDN2     | 3,6 | down | prefoldin 2                                                                            |
| 225318_at    | WHSC1L1   | 3,6 | down | Wolf-Hirschhorn syndrome candidate 1-like 1                                            |
| 202933_s_at  | YES1      | 3,6 | up   | v-yes-1 Yamaguchi sarcoma viral oncogene homolog 1                                     |
| 218542_at    | C10orf3   | 3,6 | down | chromosome 10 open reading frame 3                                                     |
| 203335_at    | PHYH      | 3,6 | up   | phytanoyl-CoA hydroxylase (Refsum disease)                                             |
| 222413_s_at  | MLL3      | 3,6 | up   | myeloid/lymphoid or mixed-lineage leukemia 3                                           |
| 223134_at    | BBX       | 3,6 | up   | bobby sox homolog (Drosophila)                                                         |
| 203659_s_at  | RFP2      | 3,6 | down | ret finger protein 2                                                                   |
| 209233_at    | C2F       | 3,6 | down | C2f protein                                                                            |
| 224759_s_at  | MGC17943  | 3,6 | down | hypothetical protein MGC17943                                                          |
| 219164_s_at  | C14orf103 | 3,6 | up   | chromosome 14 open reading frame 103                                                   |
| 225857_s_at  |           | 3,6 | down | RNA, U71A small nucleolar                                                              |
| 212536_at    | ATP11B    | 3,6 | up   | ATPase, Class VI, type 11B                                                             |
| 212152_x_at  | ARID1A    | 3,6 | down | AT rich interactive domain 1A (SWI- like)                                              |
| 230492_s_at  | KIAA1434  | 3,6 | up   | hypothetical protein KIAA1434                                                          |
| 1554351_a_at | TIPRL     | 3,6 | down | TIP41, TOR signalling pathway regulator-like (S, cerevisiae)                           |
| 212677_s_at  | KIAA0582  | 3,6 | up   | KIAA0582                                                                               |
| 201920_at    | SLC20A1   | 3,6 | down | solute carrier family 20 (phosphate transporter), member 1                             |
| 230518_at    | EVA1      | 3,6 | up   | epithelial V-like antigen 1                                                            |
| 204234_s_at  | ZNF195    | 3,5 | up   | zinc finger protein 195                                                                |
| 201779_s_at  | RNF13     | 3,5 | up   | ring finger protein 13                                                                 |
| 227786_at    | THRAP6    | 3,5 | down | thyroid hormone receptor associated protein 6                                          |
| 201879_at    | ARIH1     | 3,5 | up   | ariadne homolog, ubiquitin-conjugating enzyme E2 binding protein, 1 (Drosophila)       |
| 204009_s_at  | KRAS      | 3,5 | down | v-Ki-ras2 Kirsten rat sarcoma viral oncogene homolog                                   |
| 201340_s_at  | ENC1      | 3,5 | up   | ectodermal-neural cortex (with BTB-like domain)                                        |
| 236196_at    |           | 3,5 | up   | CDNA FLJ44883 fis, clone BRAMY2036918                                                  |
| 219976_at    | HOOK1     | 3,5 | down | hook homolog 1 (Drosophila)                                                            |
| 224913_s_at  | TMM50     | 3,5 | down | translocase of inner mitochondrial membrane 50 homolog (yeast)                         |
| 203215_s_at  | MYO6      | 3,5 | up   | myosin VI                                                                              |
| 235879_at    | MBNL1     | 3,5 | up   | Muscleblind-like (Drosophila)                                                          |
| 220703_at    | C10orf110 | 3,5 | up   | chromosome 10 open reading frame 110                                                   |
| 225005_at    | PHF13     | 3,5 | down | PHD finger protein 13                                                                  |
| 228991_at    | CDC2L5    | 3,5 | up   | Cell division cycle 2-like 5 (cholinesterase-related cell division controller)         |
| 218903_s_at  | MGC2731   | 3,5 | down | hypothetical protein MGC2731                                                           |
| 46256_at     | SPSB3     | 3,5 | up   | splA/ryanodine receptor domain and SOCS box containing 3                               |
| 212279_at    | MAC30     | 3,5 | down | hypothetical protein MAC30                                                             |
| 212532_s_at  | FLJ30656  | 3,5 | down | hypothetical protein FLJ30656                                                          |
| 226787_at    | ZNF18     | 3,5 | up   | zinc finger protein 18 (KOX 11)                                                        |
| 203592_s_at  | FSTL3     | 3,5 | up   | folliculin-like 3 (secreted glycoprotein)                                              |
| 203143_s_at  | KIAA0040  | 3,5 | up   | KIAA0040                                                                               |
| 226155_at    | KIAA1600  | 3,5 | up   | KIAA1600                                                                               |
| 203871_at    | SEN3      | 3,5 | down | SUMO1/sentrin/SMT3 specific peptidase 3                                                |
| 228238_at    | GAS5      | 3,5 | down | RNA, U47 small nuclear /// growth arrest-specific 5                                    |
| 225687_at    | C20orf129 | 3,5 | up   | chromosome 20 open reading frame 129                                                   |
| 214437_s_at  | SHMT2     | 3,5 | down | serine hydroxymethyltransferase 2 (mitochondrial)                                      |
| 218383_at    | C14orf94  | 3,5 | down | chromosome 14 open reading frame 94                                                    |
| 223743_s_at  | MRPL4     | 3,5 | down | mitochondrial ribosomal protein L4                                                     |
| 228242_at    |           | 3,5 | up   | Transcribed locus                                                                      |
| 209667_at    | CES2      | 3,5 | up   | carboxylesterase 2 (intestine, liver)                                                  |
| 221569_at    | AHI1      | 3,5 | down | Abelson helper integration site                                                        |
| 201504_s_at  | TSN       | 3,5 | down | translin                                                                               |
| 205251_at    | PER2      | 3,5 | down | period homolog 2 (Drosophila)                                                          |
| 208829_at    | TAPBP     | 3,5 | down | TAP binding protein (tapasin)                                                          |
| 224861_at    | GNAQ      | 3,5 | up   | Guanine nucleotide binding protein (G protein), q polypeptide                          |
| 202756_s_at  | GPC1      | 3,5 | up   | glypican 1                                                                             |
| 1558279_a_at | FVT1      | 3,5 | up   | Follicular lymphoma variant translocation 1                                            |
| 224562_at    | WASF2     | 3,5 | down | WAS protein family, member 2                                                           |
| 218846_at    | CRSP3     | 3,5 | up   | cofactor required for Sp1 transcriptional activation, subunit 3, 130kDa                |
| 224870_at    | KIAA0114  | 3,5 | down | KIAA0114 gene product                                                                  |
| 214845_s_at  | CALU      | 3,5 | down | calumenin                                                                              |
| 209265_s_at  | METTL3    | 3,5 | down | methyltransferase like 3                                                               |
| 204181_s_at  | ZNF297B   | 3,5 | up   | zinc finger protein 297B                                                               |
| 229622_at    | FLJ37034  | 3,5 | up   | hypothetical protein FLJ37034                                                          |
| 230177_at    |           | 3,5 | down | Transcribed locus                                                                      |
| 214352_s_at  | KRAS      | 3,5 | down | v-Ki-ras2 Kirsten rat sarcoma viral oncogene homolog                                   |
| 228497_at    | SLC22A15  | 3,5 | up   | solute carrier family 22 (organic cation transporter), member 15                       |
| 213165_at    | CAP350    | 3,5 | up   | Centrosome-associated protein 350                                                      |
| 217602_at    | PPIA      | 3,5 | up   | peptidylprolyl isomerase A (cyclophilin A)                                             |
| 201742_x_at  | SFRS1     | 3,5 | down | splicing factor, arginine/serine-rich 1 (splicing factor 2, alternate splicing factor) |
| 205579_at    | HRH1      | 3,5 | up   | histamine receptor H1                                                                  |
| 225383_at    | ZNF275    | 3,5 | up   | zinc finger protein 275                                                                |
| 212099_at    | RHOB      | 3,5 | up   | ras homolog gene family, member B                                                      |
| 224747_at    | UBE2Q2    | 3,5 | up   | ubiquitin-conjugating enzyme E2Q (putative) 2                                          |
| 209318_x_at  | PLAGL1    | 3,5 | up   | pleiomorphic adenoma gene-like 1                                                       |
| 1554768_a_at | MAD2L1    | 3,5 | down | MAD2 mitotic arrest deficient-like 1 (yeast)                                           |

|              |           |     |      |                                                                                                         |
|--------------|-----------|-----|------|---------------------------------------------------------------------------------------------------------|
| 225846_at    | RBM35A    | 3,5 | up   | RNA binding motif protein 35A                                                                           |
| 227856_at    | FLJ39370  | 3,5 | up   | hypothetical protein FLJ39370                                                                           |
| 213508_at    | C14orf147 | 3,5 | up   | chromosome 14 open reading frame 147                                                                    |
| 218979_at    | C9orf76   | 3,5 | down | chromosome 9 open reading frame 76                                                                      |
| 226895_at    | NFIC      | 3,5 | down | Nuclear factor I/C (CCAAT-binding transcription factor)                                                 |
| 220072_at    | CSPP1     | 3,5 | down | centrosome and spindle pole associated protein 1                                                        |
| 212875_s_at  | C21orf25  | 3,5 | up   | chromosome 21 open reading frame 25                                                                     |
| 212841_s_at  | PPFIBP2   | 3,5 | up   | PTPRF interacting protein, binding protein 2 (liprin beta 2)                                            |
| 218156_s_at  | FLJ10534  | 3,5 | down | hypothetical protein FLJ10534                                                                           |
| 208875_s_at  | PAK2      | 3,5 | down | p21 (CDKN1A)-activated kinase 2                                                                         |
| 91816_f_at   | RKHD1     | 3,5 | down | ring finger and KH domain containing 1                                                                  |
| 219239_s_at  | ZNF654    | 3,5 | up   | zinc finger protein 654                                                                                 |
| 217962_at    | NOLA3     | 3,5 | down | nucleolar protein family A, member 3 (H/ACA small nucleolar RNPs)                                       |
| 212859_x_at  | MT1E      | 3,5 | up   | metallothionein 1E (functional)                                                                         |
| HSAC07/X0035 | ACTB      | 3,5 | down | actin, beta                                                                                             |
| 222415_at    | MLL3      | 3,5 | up   | myeloid/lymphoid or mixed-lineage leukemia 3                                                            |
| 234725_s_at  | SEMA4B    | 3,5 | up   | (semaphorin) 4B                                                                                         |
| 217980_s_at  | MRPL16    | 3,5 | down | mitochondrial ribosomal protein L16                                                                     |
| 214061_at    | WDR67     | 3,5 | up   | WD repeat domain 67                                                                                     |
| 205061_s_at  | EXOSC9    | 3,5 | down | exosome component 9                                                                                     |
| 200854_at    | NCOR1     | 3,5 | up   | nuclear receptor co-repressor 1                                                                         |
| 1555427_s_at | SYNCRIP   | 3,5 | down | synaptotagmin binding, cytoplasmic RNA interacting protein                                              |
| 240436_at    |           | 3,5 | up   | Zinc finger, DHHC-type containing 20                                                                    |
| 241838_at    |           | 3,5 | up   | Transcribed locus                                                                                       |
| 241786_at    | PPP3R1    | 3,5 | down | Protein phosphatase 3 (formerly 2B), regulatory subunit B, 19kDa, alpha isoform (calcineurin B, type I) |
| 212845_at    | SAMD4     | 3,5 | up   | sterile alpha motif domain containing 4                                                                 |
| 204162_at    | KNTC2     | 3,5 | down | kinetochore associated 2                                                                                |
| 214383_x_at  | KLHDC3    | 3,5 | down | kelch domain containing 3                                                                               |
| 208930_s_at  | ILF3      | 3,5 | down | interleukin enhancer binding factor 3, 90kDa                                                            |
| 208093_s_at  | NDEL1     | 3,5 | up   | nidulans)                                                                                               |
| 218728_s_at  | CNIH4     | 3,5 | up   | cornichon homolog 4 (Drosophila)                                                                        |
| 201363_s_at  | IVNS1ABP  | 3,5 | down | influenza virus NS1A binding protein                                                                    |
| 203910_at    | ARHGAP29  | 3,4 | up   | Rho GTPase activating protein 29                                                                        |
| 204796_at    | EML1      | 3,4 | up   | echinoderm microtubule associated protein like 1                                                        |
| 1554423_a_at | FBXO7     | 3,4 | down | F-box protein 7                                                                                         |
| 225132_at    | FBXL3     | 3,4 | up   | F-box and leucine-rich repeat protein 3                                                                 |
| 233970_s_at  | CGI-09    | 3,4 | down | CGI-09 protein                                                                                          |
| 201462_at    | SCRN1     | 3,4 | down | secernin 1                                                                                              |
| 225171_at    | ARHGAP18  | 3,4 | down | Rho GTPase activating protein 18                                                                        |
| 227489_at    | SMURF2    | 3,4 | up   | SMAD specific E3 ubiquitin protein ligase 2                                                             |
| 213372_at    | PAQR3     | 3,4 | up   | progesterin and adipoQ receptor family member III                                                       |
| 217783_s_at  | YPEL5     | 3,4 | up   | yippee-like 5 (Drosophila)                                                                              |
| 209482_at    | POP7      | 3,4 | down | processing of precursor 7, ribonuclease P subunit (S, cerevisiae)                                       |
| 226449_at    | FLJ36090  | 3,4 | up   | hypothetical protein FLJ36090                                                                           |
| 238756_at    | GAS2L3    | 3,4 | down | Growth arrest-specific 2 like 3                                                                         |
| 224713_at    | MKI67IP   | 3,4 | down | MKI67 (FHA domain) interacting nucleolar phosphoprotein                                                 |
| 217754_at    | DDX56     | 3,4 | down | DEAD (Asp-Glu-Ala-Asp) box polypeptide 56                                                               |
| 221497_x_at  | EGLN1     | 3,4 | up   | egl nine homolog 1 (C, elegans)                                                                         |
| 218111_s_at  | CMAS      | 3,4 | down | cytidine monophosphate N-acetylneuraminic acid synthetase                                               |
| 33322_i_at   | SFN       | 3,4 | up   | stratifin                                                                                               |
| 232541_at    | EGFR      | 3,4 | up   | Epidermal growth factor receptor (erythroblastic leukemia viral (v-erb-b) oncogene homolog, avian)      |
| 201490_s_at  | PIIF      | 3,4 | down | peptidylprolyl isomerase F (cylophilin F)                                                               |
| 226924_at    | LOC400657 | 3,4 | up   | hypothetical gene supported by BC036588                                                                 |
| 226604_at    | SMILE     | 3,4 | up   | SMILE protein                                                                                           |
| 35671_at     | GTF3C1    | 3,4 | down | general transcription factor IIIC, polypeptide 1, alpha 220kDa                                          |
| 209162_s_at  | PRP4      | 3,4 | down | PRP4 pre-mRNA processing factor 4 homolog (yeast)                                                       |
| 217867_x_at  | BACE2     | 3,4 | up   | beta-site APP-cleaving enzyme 2                                                                         |
| 214030_at    | 2110      | 3,4 | up   | hypothetical protein DKFZp667G2110                                                                      |
| 226750_at    | LARP2     | 3,4 | up   | La ribonucleoprotein domain family, member 2                                                            |
| 236381_s_at  | WDR8      | 3,4 | up   | WD repeat domain 8                                                                                      |
| 202736_s_at  | LSM4      | 3,4 | down | LSM4 homolog, U6 small nuclear RNA associated (S, cerevisiae)                                           |
| 213823_at    | HOXA11    | 3,4 | up   | homeo box A11                                                                                           |
| 202625_at    | LYN       | 3,4 | up   | homolog                                                                                                 |
| 204681_s_at  | RAPGEF5   | 3,4 | up   | Rap guanine nucleotide exchange factor (GEF) 5                                                          |
| 227531_at    |           | 3,4 | down | CDNA FLJ39000 fis, clone NT2RI2022468                                                                   |
| 225220_at    |           | 3,4 | down | ACA24 snoRNA gene                                                                                       |
| 230571_at    | TM4SF11   | 3,4 | up   | Plasma membrane proteolipid (plasmolipin)                                                               |
| 206374_at    | DUSP8     | 3,4 | up   | dual specificity phosphatase 8                                                                          |
| 212414_s_at  | PAC       | 3,4 | up   | septin 6 /// cytokine-like nuclear factor n-pac                                                         |
| 210983_s_at  | MCM7      | 3,4 | down | MCM7 minichromosome maintenance deficient 7 (S, cerevisiae)                                             |
| 227514_at    | LOC162073 | 3,4 | up   | Hypothetical protein LOC162073                                                                          |
| 226748_at    | LYSMD2    | 3,4 | up   | LysM, putative peptidoglycan-binding, domain containing 2                                               |
| 213393_at    | MGC11332  | 3,4 | up   | Hypothetical protein MGC11332                                                                           |
| 207565_s_at  | MR1       | 3,4 | up   | major histocompatibility complex, class I-related                                                       |
| 217950_at    | NOSIP     | 3,4 | down | nitric oxide synthase interacting protein                                                               |
| 220520_s_at  | FLJ20130  | 3,4 | up   | hypothetical protein FLJ20130                                                                           |
| 232008_s_at  | BBX       | 3,4 | up   | bobby sox homolog (Drosophila)                                                                          |
| 230598_at    | KIAA1387  | 3,4 | up   | KIAA1387 protein                                                                                        |
| 221821_s_at  | FLJ20436  | 3,4 | up   | hypothetical protein FLJ20436                                                                           |
| 226297_at    | HIPK3     | 3,4 | up   | Homeodomain interacting protein kinase 3                                                                |
| 215483_at    | AKAP9     | 3,4 | up   | A kinase (PRKA) anchor protein (yotiao) 9                                                               |

|              |           |     |      |                                                                                          |
|--------------|-----------|-----|------|------------------------------------------------------------------------------------------|
| 218902_at    | NOTCH1    | 3,4 | up   | Notch homolog 1, translocation-associated (Drosophila)                                   |
| 207992_s_at  | AMPD3     | 3,4 | up   | adenosine monophosphate deaminase (isoform E)                                            |
| 202179_at    | BLMH      | 3,4 | up   | bleomycin hydrolase                                                                      |
| 211797_s_at  | NFYC      | 3,4 | down | nuclear transcription factor Y, gamma                                                    |
| 201286_at    | SDC1      | 3,4 | up   | syndecan 1                                                                               |
| 204080_at    | TOE1      | 3,4 | down | target of EGR1, member 1 (nuclear)                                                       |
| 205449_at    | SAC3D1    | 3,4 | up   | SAC3 domain containing 1                                                                 |
| 203693_s_at  | E2F3      | 3,4 | up   | E2F transcription factor 3                                                               |
| 202705_at    | CCNB2     | 3,4 | down | cyclin B2                                                                                |
| 227197_at    | SGEF      | 3,4 | down | Src homology 3 domain-containing guanine nucleotide exchange factor                      |
| 201716_at    | SNX1      | 3,4 | down | sorting nexin 1                                                                          |
| 236009_at    |           | 3,4 | up   | Transcribed locus                                                                        |
| 223378_at    | GLIS2     | 3,4 | up   | GLIS family zinc finger 2                                                                |
| 211980_at    | COL4A1    | 3,4 | up   | collagen, type IV, alpha 1                                                               |
| 219006_at    | C6orf66   | 3,4 | down | chromosome 6 open reading frame 66                                                       |
| 208097_s_at  | TXNDC     | 3,4 | down | thioredoxin domain containing /// thioredoxin domain containing                          |
| 229312_s_at  | GKAP1     | 3,4 | up   | G kinase anchoring protein 1                                                             |
| 204267_x_at  | PKMYT1    | 3,4 | down | protein kinase, membrane associated tyrosine/threonine 1                                 |
| 1555679_a_at | RTN4IP1   | 3,4 | down | reticulum 4 interacting protein 1                                                        |
| 226702_at    | LOC129607 | 3,4 | up   | hypothetical protein LOC129607                                                           |
| 200921_s_at  | BTG1      | 3,4 | up   | B-cell translocation gene 1, anti-proliferative                                          |
| 225735_at    | KIAA1223  | 3,4 | up   | KIAA1223 protein                                                                         |
| 1567080_s_at | CLN6      | 3,4 | down | ceroid-lipofuscinosis, neuronal 6, late infantile, variant                               |
| 227138_at    | CRTAP     | 3,4 | up   | cartilage associated protein                                                             |
| 239355_at    | GCL       | 3,3 | up   | Germ cell-less homolog 1 (Drosophila)                                                    |
| 204179_at    | MB        | 3,3 | up   | myoglobin                                                                                |
| 208884_s_at  | EDD1      | 3,3 | down | E3 ubiquitin protein ligase, HECT domain containing, 1                                   |
| 222400_s_at  | MTCBP-1   | 3,3 | up   | membrane-type 1 matrix metalloproteinase cytoplasmic tail binding protein-1              |
| 226326_at    | PCGF5     | 3,3 | up   | polycomb group ring finger 5                                                             |
| 224983_at    | SCARB2    | 3,3 | up   | scavenger receptor class B, member 2                                                     |
| 201763_s_at  | DAXX      | 3,3 | down | death-associated protein 6                                                               |
| 229638_at    | IRX3      | 3,3 | up   | iroquois homeobox protein 3                                                              |
| 228003_at    | RAB30     | 3,3 | up   | RAB30, member RAS oncogene family                                                        |
| 217749_at    | COPG      | 3,3 | down | coatamer protein complex, subunit gamma                                                  |
| 230083_at    | USP53     | 3,3 | up   | Ubiquitin specific peptidase 53                                                          |
| 212437_at    | CENPB     | 3,3 | down | centromere protein B, 80kDa                                                              |
| 202932_at    | YES1      | 3,3 | up   | v-yes-1 Yamaguchi sarcoma viral oncogene homolog 1                                       |
| 213230_at    | HUMPPA    | 3,3 | up   | paraneoplastic antigen                                                                   |
| 202975_s_at  | RHOBTB3   | 3,3 | down | Rho-related BTB domain containing 3                                                      |
| 222130_s_at  | FTSJ2     | 3,3 | down | FtsJ homolog 2 (E. coli)                                                                 |
| 235955_at    | MARVELD2  | 3,3 | up   | MARVEL domain containing 2                                                               |
| 225308_s_at  | TANC      | 3,3 | up   | TPR domain, ankyrin-repeat and coiled-coil-containing                                    |
| 1560622_at   | TPARL     | 3,3 | up   | TPA regulated locus                                                                      |
| 204905_s_at  | EEF1E1    | 3,3 | down | eukaryotic translation elongation factor 1 epsilon 1                                     |
| 219122_s_at  | ICF45     | 3,3 | down | interphase cytoplasmic foci protein 45                                                   |
| 203373_at    | SOCS2     | 3,3 | down | suppressor of cytokine signaling 2                                                       |
| 201120_s_at  | PGRMC1    | 3,3 | down | progesterone receptor membrane component 1                                               |
| 200919_at    | PHC2      | 3,3 | down | polyhomeotic-like 2 (Drosophila)                                                         |
| 242310_at    | FNBP1L    | 3,3 | up   | Formin binding protein 1-like                                                            |
| 238587_at    | STS-1     | 3,3 | up   | Cbl-interacting protein Sts-1                                                            |
| 1566887_x_at | KIAA0284  | 3,3 | up   | KIAA0284                                                                                 |
| 221656_s_at  | ARHGEF10L | 3,3 | up   | Rho guanine nucleotide exchange factor (GEF) 10-like                                     |
| 202169_s_at  | AASDHPPT  | 3,3 | down | aminoadipate-semialdehyde dehydrogenase-phosphopantetheinyl transferase                  |
| 231899_at    | ZC3H12C   | 3,3 | up   | zinc finger CCCH-type containing 12C                                                     |
| 1564381_s_at | CEBPZ     | 3,3 | up   | CCAAT/enhancer binding protein zeta                                                      |
| 209475_at    | USP15     | 3,3 | up   | ubiquitin specific peptidase 15                                                          |
| 201688_s_at  | TPD52     | 3,3 | down | tumor protein D52                                                                        |
| 228401_at    | ATAD2     | 3,3 | down | ATPase family, AAA domain containing 2                                                   |
| 208896_at    | DDX18     | 3,3 | down | DEAD (Asp-Glu-Ala-Asp) box polypeptide 18                                                |
| 212533_at    | WEE1      | 3,3 | up   | WEE1 homolog (S. pombe)                                                                  |
| 208799_at    | PSMB5     | 3,3 | down | proteasome (prosome, macropain) subunit, beta type, 5                                    |
| 209502_s_at  | BAIAP2    | 3,3 | up   | BAI1-associated protein 2                                                                |
| 218733_at    | RNF184    | 3,3 | up   | ring finger protein 184                                                                  |
| 241968_at    |           | 3,3 | up   | Transcribed locus                                                                        |
| 212527_at    | D15Wsu75e | 3,3 | down | DNA segment, Chr 15, Wayne State University 75, expressed                                |
| 223271_s_at  | CTDSP2    | 3,3 | down | CTD (carboxy-terminal domain, RNA polymerase II, polypeptide A) small phosphatase like 2 |
| 226553_at    | TMPRSS2   | 3,3 | up   | transmembrane protease, serine 2                                                         |
| 210676_x_at  | RANBP2L1  | 3,3 | up   | RAN binding protein 2-like 1                                                             |
| 204215_at    | C7orf23   | 3,3 | up   | chromosome 7 open reading frame 23                                                       |
| 206561_s_at  | AKR1B10   | 3,3 | up   | aldo-keto reductase family 1, member B10 (aldose reductase)                              |
| 205068_s_at  | ARHGAP26  | 3,3 | up   | Rho GTPase activating protein 26                                                         |
| 208637_x_at  | ACTN1     | 3,3 | down | actinin, alpha 1                                                                         |
| 204798_at    | MYB       | 3,3 | up   | v-myb myeloblastosis viral oncogene homolog (avian)                                      |
| 227312_at    | SNTB2     | 3,3 | up   | Syntrophin, beta 2 (dystrophin-associated protein A1, 59kDa, basic component 2)          |
| 202431_s_at  | MYC       | 3,3 | down | v-myc myelocytomatosis viral oncogene homolog (avian)                                    |
| 219538_at    | WDR5B     | 3,3 | down | WD repeat domain 5B                                                                      |
| 210827_s_at  | ELF3      | 3,3 | up   | E74-like factor 3 (ets domain transcription factor, epithelial-specific )                |
| 225470_at    | NUP35     | 3,3 | down | nucleoporin 35kDa                                                                        |
| 217822_at    | WBP11     | 3,3 | down | WW domain binding protein 11                                                             |
| 201357_s_at  | SF3A1     | 3,3 | down | splicing factor 3a, subunit 1, 120kDa                                                    |
| 224391_s_at  | YSG2      | 3,3 | up   | Ysg2 homolog (mouse) /// Ysg2 homolog (mouse)                                            |

|              |             |     |      |                                                                                                                   |
|--------------|-------------|-----|------|-------------------------------------------------------------------------------------------------------------------|
| 204554_at    | PPP1R3D     | 3,3 | up   | protein phosphatase 1, regulatory subunit 3D                                                                      |
| 238002_at    | GOLPH4      | 3,3 | up   | golgi phosphoprotein 4                                                                                            |
| 241879_at    |             | 3,3 | up   | Transcribed locus                                                                                                 |
| 213028_at    | NFRKB       | 3,3 | down | nuclear factor related to kappaB binding protein                                                                  |
| 203797_at    | VSNL1       | 3,3 | up   | visinin-like 1                                                                                                    |
| 218027_at    | MRPL15      | 3,3 | down | mitochondrial ribosomal protein L15                                                                               |
| 1554149_at   | C3orf4      | 3,3 | down | chromosome 3 open reading frame 4                                                                                 |
| 203214_x_at  | CDC2        | 3,3 | down | cell division cycle 2, G1 to S and G2 to M                                                                        |
| 226077_at    | FLJ31951    | 3,3 | down | hypothetical protein FLJ31951                                                                                     |
| 225103_at    | MRPL38      | 3,2 | down | mitochondrial ribosomal protein L38                                                                               |
| 242196_at    | RICS        | 3,2 | down | Rho GTPase-activating protein                                                                                     |
| 226202_at    | ZNF398      | 3,2 | up   | zinc finger protein 398                                                                                           |
| 225770_at    | KIAA1972    | 3,2 | down | KIAA1972 protein                                                                                                  |
| 225164_s_at  | EIF2AK4     | 3,2 | up   | eukaryotic translation initiation factor 2 alpha kinase 4                                                         |
| 1565951_s_at | CHML        | 3,2 | down | choroideremia-like (Rab escort protein 2)                                                                         |
| 202109_at    | ARFIP2      | 3,2 | down | ADP-ribosylation factor interacting protein 2 (arfaptin 2)                                                        |
| 218888_s_at  | NETO2       | 3,2 | down | neuropilin (NRP) and tolloid (TLL)-like 2                                                                         |
| 44111_at     | VPS33B      | 3,2 | up   | vacuolar protein sorting 33B (yeast)                                                                              |
| 209454_s_at  | TEAD3       | 3,2 | up   | TEA domain family member 3                                                                                        |
| 203392_s_at  | CTBP1       | 3,2 | down | C-terminal binding protein 1                                                                                      |
| 564_at       | GNA11       | 3,2 | up   | guanine nucleotide binding protein (G protein), alpha 11 (Gq class)                                               |
| 226605_at    | DGKQ        | 3,2 | up   | diacylglycerol kinase, theta 110kDa                                                                               |
| 203040_s_at  | HMBS        | 3,2 | down | hydroxymethylbilane synthase                                                                                      |
| 202449_s_at  | RXRA        | 3,2 | up   | retinoid X receptor, alpha                                                                                        |
| 203913_s_at  | HPGD        | 3,2 | up   | hydroxyprostaglandin dehydrogenase 15-(NAD)                                                                       |
| 229163_at    | CAMK2N1     | 3,2 | up   | calcium/calmodulin-dependent protein kinase II inhibitor 1                                                        |
| 222196_at    | LOC286434   | 3,2 | up   | hypothetical protein LOC286434                                                                                    |
| 216048_s_at  | RHOBTB3     | 3,2 | down | Rho-related BTB domain containing 3                                                                               |
| 210740_s_at  | ITPK1       | 3,2 | up   | inositol 1,3,4-triphosphate 5/6 kinase                                                                            |
| 216698_x_at  | OR7E18P /// | 3,2 | up   | member 18 pseudogene /// olfactory receptor, family 7, subfamily E, member 35 pseudogene /// similar to olfactory |
| 209300_s_at  | NECAP1      | 3,2 | down | NECAP endocytosis associated 1                                                                                    |
| 228073_at    | HDHD4       | 3,2 | up   | haloacid dehalogenase-like hydrolase domain containing 4                                                          |
| 204299_at    | FUSIP1      | 3,2 | down | FUS interacting protein (serine/arginine-rich) 1                                                                  |
| 1569320_at   | SP192       | 3,2 | up   | GC-rich promoter binding protein 1-like 1                                                                         |
| 202047_s_at  | CBX6        | 3,2 | down | chromobox homolog 6                                                                                               |
| 200666_s_at  | DNAJB1      | 3,2 | down | DnaJ (Hsp40) homolog, subfamily B, member 1                                                                       |
| 219588_s_at  | LUZP5       | 3,2 | down | leucine zipper protein 5                                                                                          |
| 206744_s_at  | ZMYM5       | 3,2 | up   | zinc finger, MYM-type 5                                                                                           |
| 202833_s_at  | SERPINA1    | 3,2 | up   | serpin peptidase inhibitor, clade A (alpha-1 antiproteinase, antitrypsin), member 1                               |
| 229111_at    | MASP2       | 3,2 | up   | Mannan-binding lectin serine peptidase 2                                                                          |
| 226576_at    | ARHGAP26    | 3,2 | up   | Rho GTPase activating protein 26                                                                                  |
| 233056_x_at  | DLGAP4      | 3,2 | up   | discs, large (Drosophila) homolog-associated protein 4                                                            |
| 202012_s_at  | EXT2        | 3,2 | up   | exostoses (multiple) 2                                                                                            |
| 231034_s_at  | NHSL1       | 3,2 | up   | NHS-like 1                                                                                                        |
| 219426_at    | EIF2C3      | 3,2 | up   | eukaryotic translation initiation factor 2C, 3                                                                    |
| 213982_s_at  | RABGAP1L    | 3,2 | up   | RAB GTPase activating protein 1-like                                                                              |
| 207265_s_at  | KDEL3       | 3,2 | down | KDEL (Lys-Asp-Glu-Leu) endoplasmic reticulum protein retention receptor 3                                         |
| 200707_at    | PRKCSH      | 3,2 | down | protein kinase C substrate 80K-H                                                                                  |
| 218248_at    | FLJ22794    | 3,2 | down | FLJ22794 protein                                                                                                  |
| 207002_s_at  | PLAGL1      | 3,2 | up   | pleiomorphic adenoma gene-like 1                                                                                  |
| 230180_at    | DDX17       | 3,2 | down | DEAD (Asp-Glu-Ala-Asp) box polypeptide 17                                                                         |
| 219862_s_at  | NARF        | 3,2 | up   | nuclear prelamin A recognition factor                                                                             |
| 227687_at    | HYLS1       | 3,2 | down | hydroletharus syndrome 1                                                                                          |
| 210178_x_at  | FUSIP1      | 3,2 | down | FUS interacting protein (serine/arginine-rich) 1                                                                  |
| 214751_at    | ZNF468      | 3,2 | up   | zinc finger protein ZNF468                                                                                        |
| 204319_s_at  | RGS10       | 3,2 | up   | regulator of G-protein signalling 10                                                                              |
| 205393_s_at  | CHEK1       | 3,2 | down | CHK1 checkpoint homolog (S, pombe)                                                                                |
| 238462_at    | STS-1       | 3,2 | up   | Cbl-interacting protein Sts-1                                                                                     |
| 227256_at    | USP31       | 3,2 | up   | ubiquitin specific peptidase 31                                                                                   |
| 201656_at    | ITGA6       | 3,2 | up   | integrin, alpha 6                                                                                                 |
| 218516_s_at  | IMPAD1      | 3,2 | down | inositol monophosphatase domain containing 1                                                                      |
| 217878_s_at  | CDC27       | 3,2 | down | cell division cycle 27                                                                                            |
| 204426_at    | TMED2       | 3,2 | down | transmembrane emp24 domain trafficking protein 2                                                                  |
| 217833_at    | SYNCRIP     | 3,2 | down | synaptotagmin binding, cytoplasmic RNA interacting protein                                                        |
| 226747_at    | KIAA1344    | 3,2 | up   | KIAA1344                                                                                                          |
| 225065_x_at  | MGC40157    | 3,2 | down | hypothetical protein MGC40157                                                                                     |
| 203509_at    | SORL1       | 3,2 | up   | sortilin-related receptor, L(DLR class) A repeats-containing                                                      |
| 209180_at    | RABGGTB     | 3,2 | down | Rab geranylgeranyltransferase, beta subunit                                                                       |
| 226805_at    | C20orf142   | 3,2 | up   | chromosome 20 open reading frame 142                                                                              |
| 231952_at    | FLJ25715    | 3,2 | up   | Hypothetical protein FLJ25715                                                                                     |
| 213761_at    | MDM1        | 3,2 | down | Mdm4, transformed 3T3 cell double minute 1, p53 binding protein (mouse)                                           |
| 219029_at    | FLJ21657    | 3,2 | down | hypothetical protein FLJ21657                                                                                     |
| 1553690_at   | SGOL1       | 3,2 | down | shugoshin-like 1 (S, pombe)                                                                                       |
| 230634_x_at  | LOC113179   | 3,2 | up   | hypothetical protein BC011824                                                                                     |
| 201329_s_at  | ETS2        | 3,2 | down | v-ets erythroblastosis virus E26 oncogene homolog 2 (avian)                                                       |
| 225598_at    | SLC45A4     | 3,2 | up   | solute carrier family 45, member 4                                                                                |
| 223104_at    | JAGN1       | 3,2 | down | jagunal homolog 1 (Drosophila)                                                                                    |
| 202884_s_at  | PPP2R1B     | 3,2 | down | protein phosphatase 2 (formerly 2A), regulatory subunit A (PR 65), beta isoform                                   |
| 212759_s_at  | TCF7L2      | 3,2 | down | transcription factor 7-like 2 (T-cell specific, HMG-box)                                                          |
| 219756_s_at  | POF1B       | 3,2 | up   | premature ovarian failure, 1B                                                                                     |
| 203224_at    | RFK         | 3,2 | up   | riboflavin kinase                                                                                                 |

|              |           |     |      |                                                                                               |
|--------------|-----------|-----|------|-----------------------------------------------------------------------------------------------|
| 207239_s_at  | PCTK1     | 3,2 | down | PCTAIRE protein kinase 1                                                                      |
| 227611_at    | TARSL2    | 3,2 | up   | threonyl-tRNA synthetase-like 2                                                               |
| 213766_x_at  | GNA11     | 3,2 | up   | guanine nucleotide binding protein (G protein), alpha 11 (Gq class)                           |
| 223176_at    | C6orf69   | 3,2 | down | chromosome 6 open reading frame 69                                                            |
| 200604_s_at  | PRKAR1A   | 3,2 | down | protein kinase, cAMP-dependent, regulatory, type I, alpha (tissue specific extinguisher 1)    |
| 219673_at    | C6orf61   | 3,2 | up   | chromosome 6 open reading frame 61                                                            |
| 209467_s_at  | MKNK1     | 3,2 | down | MAP kinase interacting serine/threonine kinase 1                                              |
| 218260_at    | PCIA1     | 3,2 | down | cross-immune reaction antigen PCIA1                                                           |
| 208939_at    | SEPHS1    | 3,2 | down | selenophosphate synthetase 1                                                                  |
| 204127_at    | RFC3      | 3,2 | down | replication factor C (activator 1) 3, 38kDa                                                   |
| 1558401_at   |           | 3,2 | up   | CDNA FLJ41675 fis, clone HCASM2002148                                                         |
| 224428_s_at  | CDCA7     | 3,2 | down | cell division cycle associated 7 /// cell division cycle associated 7                         |
| 209129_at    | TRIP6     | 3,2 | down | thyroid hormone receptor interactor 6                                                         |
| 205315_s_at  | SNTB2     | 3,2 | up   | syntrophin, beta 2 (dystrophin-associated protein A1, 59kDa, basic component 2)               |
| 219043_s_at  | LOC285359 | 3,2 | up   | phosducin-like 3 /// hypothetical protein FLJ12205                                            |
| 200916_at    | TAGLN2    | 3,2 | down | transgelin 2                                                                                  |
| 222751_at    | FLJ22313  | 3,2 | up   | hypothetical protein FLJ22313                                                                 |
| 202985_s_at  | BAG5      | 3,2 | up   | BCL2-associated athanogene 5                                                                  |
| 204177_s_at  | KLHL20    | 3,2 | up   | kelch-like 20 (Drosophila)                                                                    |
| 226438_at    | SNTB1     | 3,2 | down | Syntrophin, beta 1 (dystrophin-associated protein A1, 59kDa, basic component 1)               |
| 236368_at    | KIAA0368  | 3,2 | up   | KIAA0368                                                                                      |
| 209682_at    | CBLB      | 3,2 | up   | Cas-Br-M (murine) ecotropic retroviral transforming sequence b                                |
| 223490_s_at  | EXOSC3    | 3,2 | down | exosome component 3                                                                           |
| 201302_at    | ANXA4     | 3,2 | up   | annexin A4                                                                                    |
| 210027_s_at  | APEX1     | 3,2 | down | APEX nuclease (multifunctional DNA repair enzyme) 1                                           |
| 219362_at    | MAK10     | 3,2 | up   | MAK10 homolog, amino-acid N-acetyltransferase subunit, (S, cerevisiae)                        |
| 204831_at    | CDK8      | 3,2 | up   | Cyclin-dependent kinase 8                                                                     |
| 202777_at    | SHOC2     | 3,2 | up   | soc-2 suppressor of clear homolog (C, elegans)                                                |
| 225543_at    | GTF3C4    | 3,1 | up   | General transcription factor IIIC, polypeptide 4, 90kDa                                       |
| 202424_at    | MAP2K2    | 3,1 | down | mitogen-activated protein kinase kinase 2                                                     |
| 218734_at    | FLJ13848  | 3,1 | down | hypothetical protein FLJ13848                                                                 |
| 225580_at    | MRPL50    | 3,1 | down | mitochondrial ribosomal protein L50                                                           |
| 224036_s_at  | LMBR1     | 3,1 | down | limb region 1 homolog (mouse)                                                                 |
| 223151_at    | DCUN1D5   | 3,1 | down | DCN1, defective in cullin neddylation 1, domain containing 5 (S, cerevisiae)                  |
| 220840_s_at  | C10orf112 | 3,1 | down | chromosome 1 open reading frame 112                                                           |
| 205077_s_at  | PIGF      | 3,1 | up   | phosphatidylinositol glycan, class F                                                          |
| 242515_x_at  | C11orf17  | 3,1 | down | chromosome 11 open reading frame 17                                                           |
| 224753_at    | CDCA5     | 3,1 | down | cell division cycle associated 5                                                              |
| 209725_at    | DRIM      | 3,1 | down | down-regulated in metastasis                                                                  |
| 212033_at    | RBM25     | 3,1 | down | RNA binding motif protein 25                                                                  |
| 226185_at    | CDS1      | 3,1 | up   | CDP-diacylglycerol synthase (phosphatidate cytidyltransferase) 1                              |
| 1554539_a_at | RHOF      | 3,1 | down | ras homolog gene family, member F (in filopodia)                                              |
| 212493_s_at  | HYPB      | 3,1 | up   | huntingtin interacting protein B                                                              |
| 222380_s_at  |           | 3,1 | up   | Similar to Microneme antigen                                                                  |
| 227473_at    | CTTN      | 3,1 | up   | Cortactin                                                                                     |
| 203320_at    | LNK       | 3,1 | up   | lymphocyte adaptor protein                                                                    |
| 208916_at    | SLC1A5    | 3,1 | down | solute carrier family 1 (neutral amino acid transporter), member 5                            |
| 203939_at    | NT5E      | 3,1 | up   | 5'-nucleotidase, ecto (CD73)                                                                  |
| 218617_at    | TRIT1     | 3,1 | up   | tRNA isopentenyltransferase 1                                                                 |
| 205196_s_at  | AP1S1     | 3,1 | down | adaptor-related protein complex 1, sigma 1 subunit                                            |
| 229017_s_at  | RIPK5     | 3,1 | up   | receptor interacting protein kinase 5                                                         |
| 212190_at    | SERPINE2  | 3,1 | up   | serpin peptidase inhibitor, clade E (nexin, plasminogen activator inhibitor type 1), member 2 |
| 221994_at    | PDLIM5    | 3,1 | up   | PDZ and LIM domain 5                                                                          |
| 223013_at    | TBL1XR1   | 3,1 | down | transducin (beta)-like 1X-linked receptor 1                                                   |
| 218152_at    | HMG20A    | 3,1 | down | high-mobility group 20A                                                                       |
| 200757_s_at  | CALU      | 3,1 | down | calumenin                                                                                     |
| 1568609_s_at | FLJ39739  | 3,1 | down | family with sequence similarity 91, member A2 /// FLJ39739 protein                            |
| 235154_at    | TAF3      | 3,1 | up   | TAF3 RNA polymerase II, TATA box binding protein (TBP)-associated factor, 140kDa              |
| 222212_s_at  | LASS2     | 3,1 | down | LAG1 longevity assurance homolog 2 (S, cerevisiae)                                            |
| 219181_at    | LIPG      | 3,1 | up   | lipase, endothelial                                                                           |
| 217899_at    | FLJ20254  | 3,1 | down | Hypothetical protein FLJ20254                                                                 |
| 232471_at    | MYO1E     | 3,1 | up   | Myosin IE                                                                                     |
| 208652_at    | PPP2CA    | 3,1 | down | protein phosphatase 2 (formerly 2A), catalytic subunit, alpha isoform                         |
| 225173_at    | ARHGAP18  | 3,1 | down | Rho GTPase activating protein 18                                                              |
| 209177_at    | 123       | 3,1 | down | nuclear protein E3-3                                                                          |
| 227295_at    | IKIP      | 3,1 | up   | IKK interacting protein                                                                       |
| 224721_at    | WDR75     | 3,1 | down | WD repeat domain 75                                                                           |
| 218633_x_at  | ABHD10    | 3,1 | down | abhydrolase domain containing 10                                                              |
| 201970_s_at  | NASP      | 3,1 | down | nuclear autoantigenic sperm protein (histone-binding)                                         |
| 222037_at    | MCM4      | 3,1 | down | MCM4 minichromosome maintenance deficient 4 (S, cerevisiae)                                   |
| 212595_s_at  | DAZAP2    | 3,1 | down | DAZ associated protein 2                                                                      |
| 218373_at    | FTS       | 3,1 | up   | fused toes homolog (mouse)                                                                    |
| 222995_s_at  | RHBDL7    | 3,1 | down | rhomboid, veinlet-like 7 (Drosophila)                                                         |
| 239208_s_at  |           | 3,1 | down | Full-length cDNA clone CS0CAP007YH21 of Thymus of Homo sapiens (human)                        |
| 212895_s_at  | ABR       | 3,1 | up   | active BCR-related gene                                                                       |
| 229399_at    | C10orf118 | 3,1 | down | chromosome 10 open reading frame 118                                                          |
| 222770_s_at  | FLJ13220  | 3,1 | up   | hypothetical protein FLJ13220                                                                 |
| 216863_s_at  | MORC2     | 3,1 | down | MORC family CW-type zinc finger 2                                                             |
| 209907_s_at  | ITSN2     | 3,1 | up   | intersectin 2                                                                                 |
| 212724_at    | RND3      | 3,1 | up   | Rho family GTPase 3                                                                           |
| 225160_x_at  | MGC5370   | 3,1 | up   | hypothetical protein MGC5370                                                                  |

|              |           |     |      |                                                                                              |
|--------------|-----------|-----|------|----------------------------------------------------------------------------------------------|
| 219439_at    | C1GALT1   | 3,1 | up   | core 1 synthase, glycoprotein-N-acetylgalactosamine 3-beta-galactosyltransferase, 1          |
| 202626_s_at  | LYN       | 3,1 | up   | homolog                                                                                      |
| 209161_at    | PRPF4     | 3,1 | down | PRP4 pre-mRNA processing factor 4 homolog (yeast)                                            |
| 208328_s_at  | MEF2A     | 3,1 | up   | MADS box transcription enhancer factor 2, polypeptide A (myocyte enhancer factor 2A)         |
| 222688_at    | PHCA      | 3,1 | up   | phytoceramidase, alkaline                                                                    |
| 226233_at    | B3GALNT2  | 3,1 | up   | UDP-GalNAc:betaGlcNAc beta 1,3-galactosaminyltransferase, polypeptide 2                      |
| 223465_at    | COL4A3BP  | 3,1 | down | collagen, type IV, alpha 3 (Goodpasture antigen) binding protein                             |
| 200753_x_at  | SFRS2     | 3,1 | down | splicing factor, arginine/serine-rich 2                                                      |
| 213134_x_at  | BTG3      | 3,1 | down | BTG family, member 3                                                                         |
| 203740_at    | MPHOSPH6  | 3,1 | down | M-phase phosphoprotein 6                                                                     |
| 204686_at    | IRS1      | 3,1 | down | insulin receptor substrate 1                                                                 |
| 214119_s_at  | FKBP1A    | 3,1 | down | FK506 binding protein 1A, 12kDa                                                              |
| 1557458_s_at | SHB       | 3,1 | up   | Src homology 2 domain containing adaptor protein B                                           |
| 222459_at    | C1orf108  | 3,1 | down | chromosome 1 open reading frame 108                                                          |
| 207891_s_at  | UIP1      | 3,1 | down | three prime repair exonuclease 2 /// 26S proteasome-associated UCH interacting protein 1     |
| 212245_at    | MCFD2     | 3,1 | up   | multiple coagulation factor deficiency 2                                                     |
| 202130_at    | RIOK3     | 3,1 | up   | RIO kinase 3 (yeast) /// RIO kinase 3 (yeast)                                                |
| 217774_s_at  | HSPC152   | 3,1 | down | hypothetical protein HSPC152                                                                 |
| 227567_at    | GRB2-like | 3,1 | up   | SH3-domain GRB2-like pseudogene 3                                                            |
| 232266_x_at  | CDC2L5    | 3,1 | up   | Cell division cycle 2-like 5 (cholinesterase-related cell division controller)               |
| 226348_at    |           | 3,1 | up   |                                                                                              |
| 219437_s_at  | ANKRD11   | 3,1 | up   | ankyrin repeat domain 11                                                                     |
| 224932_at    | C22orf16  | 3,1 | down | chromosome 22 open reading frame 16                                                          |
| 209276_s_at  | GLRX      | 3,1 | down | glutaredoxin (thioltransferase)                                                              |
| 223912_s_at  | CLN8      | 3,1 | up   | ceroid-lipofuscinosis, neuronal 8 (epilepsy, progressive with mental retardation)            |
| 209572_s_at  | EED       | 3,1 | up   | embryonic ectoderm development                                                               |
| 212742_at    | ZNF364    | 3,1 | down | zinc finger protein 364                                                                      |
| 238883_at    | THRAP2    | 3,1 | up   | Thyroid hormone receptor associated protein 2                                                |
| 231775_at    | TNFRSF10A | 3,1 | up   | tumor necrosis factor receptor superfamily, member 10a                                       |
| 219024_at    | PLEKHA1   | 3,1 | up   | pleckstrin homology domain containing, family A (phosphoinositide binding specific) member 1 |
| 205293_x_at  | BAIAP2    | 3,1 | up   | BAI1-associated protein 2                                                                    |
| 200703_at    | DNCL1     | 3,1 | down | dynein, cytoplasmic, light polypeptide 1                                                     |
| 223381_at    | CDCA1     | 3,1 | down | cell division cycle associated 1                                                             |
| 225239_at    |           | 3,1 | up   | CDNA FLJ26120 fis, clone SYN00419                                                            |
| 226393_at    | CYP2U1    | 3,1 | up   | cytochrome P450, family 2, subfamily U, polypeptide 1                                        |
| 219866_at    | CLIC5     | 3,1 | up   | chloride intracellular channel 5                                                             |
| 200644_at    | MARCKSL1  | 3,1 | down | MARCKS-like 1                                                                                |
| 212254_s_at  | DST       | 3,1 | up   | dystonin                                                                                     |
| 201881_s_at  | ARIH1     | 3,1 | up   | ariadne homolog, ubiquitin-conjugating enzyme E2 binding protein, 1 (Drosophila)             |
| 239133_at    | HSPC129   | 3,0 | down | CTD (carboxy-terminal domain, RNA polymerase II, polypeptide A) small phosphatase like 2     |
| 225253_s_at  | FLJ12760  | 3,0 | down | methyltransferase like 2 /// hypothetical protein FLJ12760                                   |
| 201669_s_at  | MARCKS    | 3,0 | down | myristoylated alanine-rich protein kinase C substrate                                        |
| 218137_s_at  | SMAP1     | 3,0 | up   | stromal membrane-associated protein 1                                                        |
| 213376_at    | ZBTB1     | 3,0 | up   | zinc finger and BTB domain containing 1                                                      |
| 200722_s_at  | M11S1     | 3,0 | down | membrane component, chromosome 11, surface marker 1                                          |
| 202514_at    | DLG1      | 3,0 | down | discs, large homolog 1 (Drosophila)                                                          |
| 219759_at    | LRAP      | 3,0 | up   | leukocyte-derived arginine aminopeptidase                                                    |
| 210679_x_at  |           | 3,0 | up   |                                                                                              |
| 222544_s_at  | WHSC1L1   | 3,0 | down | Wolf-Hirschhorn syndrome candidate 1-like 1                                                  |
| 204286_s_at  | PMaip1    | 3,0 | up   | phorbol-12-myristate-13-acetate-induced protein 1                                            |
| 241985_at    | JMY       | 3,0 | up   | junction-mediating and regulatory protein                                                    |
| 226515_at    | LOC133957 | 3,0 | down | similar to RIKEN cDNA 0610011N22                                                             |
| 201696_at    | SFRS4     | 3,0 | down | splicing factor, arginine/serine-rich 4                                                      |
| 204679_at    | KCNK1     | 3,0 | up   | potassium channel, subfamily K, member 1                                                     |
| 226626_at    | THOC2     | 3,0 | down | THO complex 2                                                                                |
| 204039_at    | CEBPA     | 3,0 | up   | CCAAT/enhancer binding protein (C/EBP), alpha                                                |
| 225578_at    | LOC440145 | 3,0 | down | similar to RIKEN cDNA 2410129H14                                                             |
| 217748_at    | ADIPOR1   | 3,0 | down | adiponectin receptor 1 /// adiponectin receptor 1                                            |
| 202028_s_at  |           | 3,0 | up   |                                                                                              |
| 201734_at    | CLCN3     | 3,0 | down | Chloride channel 3                                                                           |
| 227921_at    |           | 3,0 | down |                                                                                              |
| 223639_s_at  | ZNRD1     | 3,0 | down | zinc ribbon domain containing, 1                                                             |
| 210480_s_at  | MYO6      | 3,0 | up   | myosin VI                                                                                    |
| 205709_s_at  | CDS1      | 3,0 | up   | CDP-diacylglycerol synthase (phosphatidate cytidyltransferase) 1                             |
| 227668_at    | FLJ31528  | 3,0 | up   | hypothetical protein FLJ31528                                                                |
| 209580_s_at  | MBD4      | 3,0 | down | methyl-CpG binding domain protein 4                                                          |
| 216593_s_at  | PIGC      | 3,0 | down | phosphatidylinositol glycan, class C                                                         |
| 230713_at    | ZCCHC11   | 3,0 | up   | Zinc finger, CCHC domain containing 11                                                       |
| 218611_at    | IER5      | 3,0 | up   | immediate early response 5                                                                   |
| 228334_x_at  | KIAA1712  | 3,0 | down | KIAA1712                                                                                     |
| 239202_at    | RAB3B     | 3,0 | up   | RAB3B, member RAS oncogene family                                                            |
| 213590_at    | SLC16A5   | 3,0 | up   | solute carrier family 16 (monocarboxylic acid transporters), member 5                        |
| 202907_s_at  | NBN       | 3,0 | down | nibrin                                                                                       |
| 1562391_at   | MGC39558  | 3,0 | up   | UDP-GalNAc:betaGlcNAc beta 1,3-galactosaminyltransferase, polypeptide 2                      |
| 212238_at    | ASXL1     | 3,0 | down | additional sex combs like 1 (Drosophila)                                                     |
| 225300_at    | C15orf23  | 3,0 | down | chromosome 15 open reading frame 23                                                          |
| 244032_at    |           | 3,0 | up   | Transcribed locus                                                                            |
| 212461_at    | AZIN1     | 3,0 | down | antizyme inhibitor 1                                                                         |
| 57163_at     | ELOVL1    | 3,0 | up   | elongation of very long chain fatty acids (FEN1/Elo2, SUR4/Elo3, yeast)-like 1               |
| 200991_s_at  | SNX17     | 3,0 | down | sorting nexin 17                                                                             |
| 209679_s_at  | LOC57228  | 3,0 | down | small trans-membrane and glycosylated protein                                                |

|              |           |     |      |                                                                                                               |
|--------------|-----------|-----|------|---------------------------------------------------------------------------------------------------------------|
| 212628_at    | PKN2      | 3,0 | down | Protein kinase N2                                                                                             |
| 227250_at    | KREMEN1   | 3,0 | up   | Kringle containing transmembrane protein 1                                                                    |
| 202645_s_at  | MEN1      | 3,0 | down | multiple endocrine neoplasia I                                                                                |
| 235174_s_at  |           | 3,0 | down | CDNA clone IMAGE:5286843                                                                                      |
| 219518_s_at  | ELL3      | 3,0 | up   | elongation factor RNA polymerase II-like 3                                                                    |
| 212538_at    | DOCK9     | 3,0 | up   | dedicator of cytokinesis 9                                                                                    |
| 212842_x_at  | ///       | 3,0 | up   | RAN binding protein 2-like 1 /// similar to Ran-binding protein 2 /// similar to RAN-binding protein 2-like 1 |
| 201178_at    | FBXO7     | 3,0 | down | F-box protein 7                                                                                               |
| 222781_s_at  | C9orf40   | 3,0 | down | chromosome 9 open reading frame 40                                                                            |
| 227647_at    | KCNE3     | 3,0 | down | potassium voltage-gated channel, Isk-related family, member 3                                                 |
| 224467_s_at  | MGC13096  | 3,0 | down | hypothetical protein MGC13096 /// hypothetical protein MGC13096                                               |
| 207358_x_at  | MACF1     | 3,0 | up   | microtubule-actin crosslinking factor 1                                                                       |
| 228810_at    | FLJ40432  | 3,0 | up   | hypothetical protein FLJ40432                                                                                 |
| 209026_x_at  | TUBB      | 3,0 | down | tubulin, beta polypeptide                                                                                     |
| 1553605_a_at | ABCA13    | 3,0 | up   | ATP-binding cassette, sub-family A (ABC1), member 13                                                          |
| 204825_at    | MELK      | 3,0 | down | maternal embryonic leucine zipper kinase                                                                      |
| 204441_s_at  | POLA2     | 3,0 | down | polymerase (DNA directed), alpha 2 (70kD subunit)                                                             |
| 227356_at    |           | 3,0 | down | CDNA FLJ26015 fis, clone MPC03596                                                                             |
| 214869_x_at  | GAPVD1    | 3,0 | down | GTPase activating protein and VPS9 domains 1                                                                  |
| 209449_at    | LSM2      | 3,0 | down | LSM2 homolog, U6 small nuclear RNA associated (S, cerevisiae)                                                 |
| 223254_s_at  | KIAA1333  | 3,0 | down | KIAA1333                                                                                                      |
| 216988_s_at  | PTP4A2    | 3,0 | down | protein tyrosine phosphatase type IVA, member 2                                                               |
| 205909_at    | POLE2     | 3,0 | down | polymerase (DNA directed), epsilon 2 (p59 subunit)                                                            |
| 1557987_at   | LOC641298 | 3,0 | up   | PI-3-kinase-related kinase SMG-1 - like locus                                                                 |
| 206113_s_at  | RAB5A     | 3,0 | down | RAB5A, member RAS oncogene family                                                                             |
| 222118_at    | BM039     | 3,0 | down | uncharacterized bone marrow protein BM039                                                                     |
| 202546_at    | VAMP8     | 3,0 | up   | vesicle-associated membrane protein 8 (endobrevin)                                                            |
| 205771_s_at  | AKAP7     | 3,0 | up   | A kinase (PRKA) anchor protein 7                                                                              |
| 214022_s_at  | IFITM1    | 3,0 | up   | interferon induced transmembrane protein 1 (9-27)                                                             |
| 221677_s_at  | DONSON    | 3,0 | down | downstream neighbor of SON                                                                                    |
| 225953_at    | P15RS     | 3,0 | down | hypothetical protein FLJ10656                                                                                 |
| 204224_s_at  | GCH1      | 3,0 | up   | GTP cyclohydrolase 1 (dopa-responsive dystonia)                                                               |
| 229333_at    |           | 3,0 | down | Transcribed locus, weakly similar to XP_512541.1 PREDICTED: similar to hypothetical protein [Pan troglodytes] |
| 236429_at    | ZNF83     | 3,0 | up   | Zinc finger protein 83 (HPF1)                                                                                 |
| 203931_s_at  | MRPL12    | 3,0 | down | mitochondrial ribosomal protein L12                                                                           |
| 223128_at    | H17       | 3,0 | down | hypothetical protein H17                                                                                      |
| 229506_at    |           | 3,0 | up   | CDNA FLJ30761 fis, clone FEBRA2000538                                                                         |
| 1555832_s_at | KLF6      | 3,0 | down | Kruppel-like factor 6                                                                                         |
| 32069_at     | N4BP1     | 3,0 | up   | Nedd4 binding protein 1                                                                                       |
| 216504_s_at  | SLC39A8   | 3,0 | up   | Solute carrier family 39 (zinc transporter), member 8                                                         |
| 212373_at    | FEM1B     | 3,0 | up   | fem-1 homolog b (C, elegans)                                                                                  |
| 228505_s_at  | LOC124491 | 3,0 | down | LOC124491                                                                                                     |
| 202631_s_at  | APPBP2    | 3,0 | down | amyloid beta precursor protein (cytoplasmic tail) binding protein 2                                           |
| 209306_s_at  | SWAP70    | 3,0 | up   | SWAP-70 protein                                                                                               |
| 213016_at    | BBX       | 3,0 | up   | Bobby sox homolog (Drosophila)                                                                                |
| 208012_x_at  | SP110     | 3,0 | up   | SP110 nuclear body protein                                                                                    |
| 1552797_s_at | PROM2     | 3,0 | up   | prominin 2                                                                                                    |
| 216237_s_at  | MCM5      | 3,0 | down | MCM5 minichromosome maintenance deficient 5, cell division cycle 46 (S, cerevisiae)                           |
| 201735_s_at  | CLCN3     | 3,0 | down | chloride channel 3                                                                                            |
| 203660_s_at  | PCNT2     | 3,0 | down | pericentrin 2 (kendrin)                                                                                       |
| 207540_s_at  | SYK       | 3,0 | up   | spleen tyrosine kinase                                                                                        |
| 205751_at    | SH3GL2    | 3,0 | down | SH3-domain GRB2-like 2                                                                                        |

Table S2 Regulated genes with their intronic miRNAs

| Gene Symbol | Gene Title                                                                                       | miRNA          | Fold change* | Regulation |
|-------------|--------------------------------------------------------------------------------------------------|----------------|--------------|------------|
| TUFT1       | tuftelin 1                                                                                       | hsa-mir-554    | 18,5         | up         |
| BCAR3       | breast cancer anti-estrogen resistance 3                                                         | hsa-mir-760    | 9,4          | up         |
| PANK1       | Pantothenate kinase 1                                                                            | hsa-mir-107    | 9,1          | up         |
| PITPNC1     | phosphatidylinositol transfer protein, cytoplasmic 1                                             | hsa-mir-548d-2 | 4,4          | up         |
| KIAA1199    | KIAA1199                                                                                         | hsa-mir-549    | 7,7          | up         |
| GALNT10     | UDP-N-acetyl-alpha-D-galactosamine:polypeptide N-acetylgalactosaminyltransferase 10 (GalNAc-T10) | hsa-mir-1294   | 7,1          | up         |
| DENND1A     | DENN/MADD domain containing 1A                                                                   | hsa-mir-601    | 6,8          | up         |
| STRN3       | striatin, calmodulin binding protein 3                                                           | hsa-mir-624    | 6,4          | down       |
|             |                                                                                                  |                | 6,3          |            |
| ATAD2       | ATPase family, AAA domain containing 2                                                           | hsa-mir-548d-1 | 5,9          | down       |
|             |                                                                                                  |                | 3,3          |            |
| EIF4A2      | eukaryotic translation initiation factor 4A, isoform 2                                           | hsa-mir-1248   | 5,9          | down       |
| F8          | coagulation factor VIII, procoagulant component (hemophilia A)                                   | hsa-mir-1184   | 5,7          | up         |
| KIF18A      | kinesin family member 18A /// kinesin family member 18A                                          | hsa-mir-610    | 5,1          | down       |
| PPP3CA      | Protein phosphatase 3 (formerly 2B), catalytic subunit, alpha isoform (calcineurin A alpha)      | hsa-mir-1255a  | 5,0          | up         |
| ASH1L       | POU domain, class 6, transcription factor 1                                                      | hsa-mir-555    | 4,2          | up         |
|             |                                                                                                  |                | 4,0          |            |
| RASSF3      | Ras association (RalGDS/AF-6) domain family 3                                                    | hsa-mir-548c   | 4,1          | up         |
|             |                                                                                                  |                | 3,8          |            |
| ARIH1       | Ariadne homolog, ubiquitin-conjugating enzyme E2 binding protein, 1 (Drosophila)                 | hsa-mir-630    | 3,7          | up         |
|             |                                                                                                  |                | 3,5          |            |
|             |                                                                                                  |                | 3,1          |            |
| SCRIB       | scribbled homolog (Drosophila)                                                                   | hsa-mir-937    | 3,6          | up         |
| GPC1        | glypican 1                                                                                       | hsa-mir-149    | 3,5          | up         |
|             |                                                                                                  | hsa-mir-106b   |              |            |
| MCM7        | MCM7 minichromosome maintenance deficient 7 (S, cerevisiae)                                      | hsa-mir-25     | 3,4          | down       |
|             |                                                                                                  | hsa-mir-93     |              |            |
|             |                                                                                                  | hsa-mir-30e    |              |            |
| NFYC        | nuclear transcription factor Y, gamma                                                            | hsa-mir-30c-1  | 3,4          | down       |
| SHOC2       | soc-2 suppressor of clear homolog (C, elegans)                                                   | hsa-mir-548e   | 3,2          | up         |
| MYO1E       | myosin IE                                                                                        | hsa-mir-2116   | 3,1          | up         |
| SFRS2       | splicing factor, arginine/serine-rich 2                                                          | hsa-mir-636    | 3,1          | down       |

\* more than one fold change value for a gene results from redundant probe sets on the employed microarray



## Table S3 Target gene prediction miRNA-107

Intersection of miRanda, Pictar and Targetscan (Gene Symbol)

|          |           |        |
|----------|-----------|--------|
| ADAMTSL3 | HTR4      | WNT3A  |
| AFF2     | ITGA2     | YWHAH  |
| ALS2CR13 | JAKMIP2   | ZBTB10 |
| ANK1     | KIAA1033  | ZFPM2  |
| ARL6IP2  | KIF21A    | ZHX1   |
| ARL8B    | KIF23     | ZHX3   |
| ARMC1    | KIF3B     | ZNF650 |
| AXIN2    | KIF5A     |        |
| BACH2    | KPNA1     |        |
| BAI1     | LATS2     |        |
| BCL11A   | LRP1      |        |
| BDNF     | LRP1B     |        |
| BSDC1    | LRRC55    |        |
| BTG2     | LRRN3     |        |
| C16orf72 | MARCH3    |        |
| C20orf39 | MTMR4     |        |
| CAB39    | MTSS1     |        |
| CACNA2D1 | MYB       |        |
| CAMKV    | NDEL1     |        |
| CAPZA2   | NEDD9     |        |
| CDC37L1  | NF1       |        |
| CDK6     | PDCD10    |        |
| CELSR2   | PHF20     |        |
| CFL1     | PLAG1     |        |
| CHRM1    | PNN       |        |
| CHST11   | PRMT8     |        |
| CNTNAP1  | PURB      |        |
| CPEB3    | RAB10     |        |
| CRELD1   | RAB11FIP2 |        |
| CXorf23  | RAB1B     |        |
| DCBLD2   | RAI14     |        |
| DCUN1D4  | RAP2C     |        |
| DICER1   | RASL12    |        |
| DLL1     | RASSF5    |        |
| DYNC1LI2 | RBM24     |        |
| EIF2C1   | RGS4      |        |
| EIF2C4   | RNF125    |        |
| EIF4B    | RNF38     |        |
| EIF5     | RSBN1     |        |
| EPHA7    | RSPO3     |        |
| ESRRA    | RYBP      |        |
| FAM81A   | SATB2     |        |
| FCHSD1   | SNF1LK2   |        |
| FGF2     | SNRK      |        |
| FLOT2    | SRGAP1    |        |
| FOXJ2    | ST8SIA3   |        |
| GLUD1    | SUFU      |        |
| GLUD2    | SYNJ1     |        |
| GPC6     | TAF5      |        |
| HERC2    | TGFBR3    |        |
| HIC2     | TGIF2     |        |
| HISPPD1  | TMEM16C   |        |
| HLF      | TSPAN5    |        |
| HRB      | UBXD8     |        |

**Table S4 Gene Ontology enrichment analysis**  
**Significantly enriched GO-terms in the set of 115 putative**  
**miRNA-107 target genes.**

All terms below a significance cut-off at  $p < 0.1$  are given.

| Term                                                        | Adjusted p-value      |
|-------------------------------------------------------------|-----------------------|
| <b>GO biological process at level 3</b>                     |                       |
| regulation of biological process (GO:0050789)               | 0.0009                |
| multicellular organismal development (GO:0007275)           | 0.024                 |
| cell cycle (GO:0007049)                                     | 0.068                 |
| cell division (GO:0051301)                                  | 0.068                 |
| cellular component organization and biogenesis (GO:0016043) | 0.086                 |
| <b>GO biological process at level 4</b>                     |                       |
| negative regulation of biological process (GO:0048519)      | $1.42 \times 10^{-5}$ |
| regulation of cellular process (GO:0050794)                 | 0.0001                |
| regulation of developmental process (GO:0050793)            | 0.002                 |
| pattern specification process (GO:0007389)                  | 0.007                 |
| <b>GO biological process at level 5</b>                     |                       |
| negative regulation of cellular process (GO:0048523)        | $9.72 \times 10^{-6}$ |
| regulation of cell differentiation (GO:0045595)             | 0.0002                |
| regionalization (GO:0003002)                                | 0.026                 |
| negative regulation of developmental process (GO:0051093)   | 0.027                 |
| determination of symmetry (GO:0009799)                      | 0.066                 |
| regulation of cell cycle (GO:0051726)                       | 0.082                 |
| <b>GO cellular component at level 9</b>                     |                       |
| microtubule cytoskeleton (GO:0015630)                       | 0.011                 |
| cytoskeletal part (GO:0044430)                              | 0.051                 |

## Table S5 Primer list

### Primer sequences

**bold** = mutations

underlined = restriction sites

| Primer Name               | Sequence 5' to 3'                                                  |
|---------------------------|--------------------------------------------------------------------|
| CCNB2_RT_PCR_for          | AAAGTTGGCTCCAAGGGTCCTT                                             |
| CCNB2_RT_PCR_rev          | GAAACTGGCTGAACCTGTAAAAAT                                           |
| CDK6_RT_PCR_for           | TGCACAGTGTACGAAACAGA                                               |
| CDK6_RT_PCR_rev           | ACCTCGGAGAAGCTGAAACA                                               |
| CDK6_site_pGL4_for        | GCATCTAG <u>A</u> aacacccttggctgcttatg                             |
| CDK6_site_pGL4_rev        | GCATCTAG <u>A</u> ctgtgcttgattaccact                               |
| ChIP_ampl_1_for           | GAGTGGGATCAGTGTCCAAAGTG                                            |
| ChIP_ampl_1_rev           | CAGTGGCACAGTCGTAGCTTACTG                                           |
| ChIP_ampl_2_for           | GCTAACTCCAAGCTCGTAGTGTCTG                                          |
| ChIP_ampl_2_rev           | CACACTCAAACACCATGTGGTCTCA                                          |
| ChIP_ampl_3_for           | GACATCAAGCACTACAGGCTTTGCCT                                         |
| ChIP_ampl_3_rev           | GAGACGCTGCTGGCTACTCTG                                              |
| ChIP_ampl_4_for           | GACGTAGTTGGGGACTTGA                                                |
| ChIP_ampl_4_rev           | TGCCATTTCCAGAGCTTCTT                                               |
| ChIP_ampl_5_for           | AACAACATTGGCTCCATTGCTCGG                                           |
| ChIP_ampl_5_rev           | GCAGTTATGTGCAAGGATGCTCAGAC                                         |
| GAPDH_Northern_for        | TTTTTT <u>AAGCTT</u> CGAGATCCCTCCAAAATCAA                          |
| GAPDH_Northern_rev        | TTTTTT <u>GAATTC</u> TGTGAGGAGGGGAGATTGAG                          |
| GAPDH_RT_PCR_for          | GACCCCTTCATTGACCTCAAC                                              |
| GAPDH_RT_PCR_rev          | CACGACGTAAGTACGCGCC                                                |
| p130_RT_PCR_for           | TGCACCAAGTGAAGAACTGG                                               |
| p130_RT_PCR_rev           | ATCTCCGCAAAACGAAAATG                                               |
| p21_RT_PCR_for            | GTCAGAACCCATGCGGCAGCAAG                                            |
| p21_RT_PCR_rev            | CAGGTCCACATGGTCTTCTCTG                                             |
| p53_RT_PCR_for            | ATGGAGGAGCCGAGTCAGATC                                              |
| p53_RT_PCR_rev            | CCATTGTTCAATATCGTCCGGG                                             |
| PANK1_Northern_for        | TTT <u>AAGCTT</u> TGGAAACGCTGGTTAAATTGG                            |
| PANK1_Northern_rev        | TTT <u>GAATTC</u> CAATGGAGCAATGTTGTTG                              |
| PANK1_prom_0.9kbp_for     | GCAGGT <u>TACCCT</u> GCGGAGGAGGATGGACTC                            |
| PANK1_prom_2kbp_for       | GCAGGT <u>TACCCT</u> GTATTCTAGGTTTCTCCCTG                          |
| PANK1_prom_2kbp_rev       | GCACTCGAGTAAAGACACCCACAAGAAGTAACCAAGTTG                            |
| PANK1_prom_Δ1578_for      | GCAGGT <u>TACCCT</u> CCAAGGATTAGTATCTCTGGCC                        |
| PANK1_prom_Δ1578_rev      | GCACTCGAGGGAATCAAGTTCTCTGGGCTT                                     |
| PANK1_prom_double_mut_for | TGGCGGTGGCGGG <u>AATT</u> ACTGGG <u>AATT</u> CTCAGTGGCGGGGACCAGTCT |
| PANK1_prom_double_mut_rev | TCCCGCCACTGAG <u>AATT</u> CCCAGT <u>AATT</u> CCCGCCACCGCCACCGACGA  |
| PANK1_prom_single_mut_for | TGGCGGTGGCGGG <u>AATT</u> ACTGGGCATGCTCAGTGGCGGGGACCAGTCT          |
| PANK1_prom_single_mut_rev | TCCCGCCACTGAGCATGCCAGT <u>AATT</u> CCCGCCACCGCCACCGACGA            |
| PANK1_RT_PCR_for          | TTCGAAGAGGACTTCAGAATG                                              |
| PANK1_RT_PCR_rev          | TACACGGCTAGAATGCTGAC                                               |
| PANK1b,g_cDNA_for         | GCT <u>GGATCC</u> ATGAAGCTTATAAATGGCAAAAAGC                        |
| PANK1b,g_cDNA_rev         | GCT <u>CTCGAG</u> CTACTTGTATCAGTCATTTTGAAC                         |
| Pri-miRNA-107_RT_PCR_for  | GCAAGTCGAGCATTTTACCTGCTG                                           |
| Pri-miRNA-107_RT_PCR_rev  | GCCATGTGTCCACTGAAATGTG                                             |
| Pri-miRNA-145_RT_PCR_for  | TGGATTTGCCTCCTTCCCA                                                |
| Pri-miRNA-145_RT_PCR_rev  | TTGAACCCCTCATCTGTGAGCC                                             |
| Pri-miRNA-34_RT_PCR_for   | CCTCCAAGCCAGCTCAGTTG                                               |
| Pri-miRNA-34_RT_PCR_rev   | TGACTTTGGTCCAATTCCTGTTG                                            |
| RBL2_site_pGL4_for        | GCATCTAG <u>A</u> tgatttcctgacaaaggaga                             |
| RBL2_site_pGL4_rev        | GCATCTAG <u>A</u> ttttcttagctggttgatcccta                          |
